# Supplementary material for: The Neolithic greenstone industry of Chiomonte (northwestern Italy): mineralogy, petrography and archaeometric implications
Source: Copernicus journal article supplement (doi:10.5194/ejm-32-147-2020), 2020-01-30
Supplement: Supplementary file 1 [file ejm-32-147-2020-supplement.pdf]

Supplement of Eur. J. Mineral., 32, 147–166, 2020  
<https://doi.org/10.5194/ejm-32-147-2020-supplement>  
© Author(s) 2020. This work is distributed under  
the Creative Commons Attribution 4.0 License.

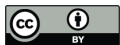

European Journal of  
Mineralogy

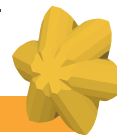

Open Access

*Supplement of*

## **The Neolithic greenstone industry of Chiomonte (northwestern Italy): mineralogy, petrography and archaeometric implications**

**Roberto Giustetto et al.**

*Correspondence to:* Roberto Giustetto ([roberto.giustetto@unito.it](mailto:roberto.giustetto@unito.it))

The copyright of individual parts of the supplement might differ from the CC BY 4.0 License.

1 **Supplementary Material**

2

3 **Tables**

4

|    | State Inventory | Excavation inventory | Other inventories | Implement function       | Lithotype                             | Notes (stereomicroscopy in reflected light/density values)               | Weight in air (g) | Weight in H <sub>2</sub> O (g) | Density (g/cm <sup>3</sup> ) | Sampling    |
|----|-----------------|----------------------|-------------------|--------------------------|---------------------------------------|--------------------------------------------------------------------------|-------------------|--------------------------------|------------------------------|-------------|
| 1  |                 | 1343                 |                   | pebble?                  | (???)                                 | NO <i>greenstone</i> ?                                                   | 52.8              | 34.8                           | 2.93                         | =           |
| 2  |                 | 2099                 |                   | splinter                 | (???)                                 | too small to provide a reliable weighing                                 | =                 | =                              | =                            | =           |
| 3  |                 | 3021                 |                   | fragment?                | (???)                                 | it contains mica, carbonates and (maybe) magnetite                       | 53.8              | 34.3                           | 2.76                         | =           |
| 4  |                 | 4774                 |                   | (striped) pendant?       | (???)                                 | NO <i>greenstone</i>                                                     | 110               | 73.5                           | 3.01                         | =           |
| 5  |                 | 5379                 |                   | roughout?                | (???)                                 | carbonate crystals in a biotite or chlorite matrix                       | 177.5             | 118.6                          | 3.01                         | =           |
| 6  |                 | 6637                 |                   | fragment?                | (???)                                 | rich in phyllosilicates                                                  | 55.8              | 38.3                           | 3.19                         | =           |
| 7  |                 | 9204                 |                   | fragment?                | (???)                                 | NO <i>greenstone</i>                                                     | 43.5              | 29.5                           | 3.11                         | =           |
| 8  |                 | 9305                 |                   | roughout?                | (???)                                 | carbonate crystals in a biotite matrix                                   | 369.6             | 244.8                          | 2.96                         | =           |
| 9  |                 | 4838                 |                   | small striker            | <b>ophiolitic gabbro</b>              | ===                                                                      | 33.1              | 22.2                           | 3.04                         | =           |
| 10 |                 | 9343                 |                   | axe talon                | <b>albite</b>                         | albite is almost the sole appreciable phase                              | 21.8              | 14.7                           | 3.07                         | =           |
| 11 |                 | 3595                 |                   | (unidentified tool) ???  | <b>chalc-mica-schist</b>              | NO <i>greenstone</i>                                                     | 571.4             | 356.10                         | 2.65                         | =           |
| 12 | 75777           | 3601                 | Museum            | millstone                | <b>chalc-mica-schist</b>              | ===                                                                      | =                 | =                              | =                            | =           |
| 13 | 86453           | 1000                 |                   | (striped) pendant?       | <b>chloritite</b>                     | NO <i>greenstone</i> - only phyllosilicates (chlorite?) are visible      | 71.3              | 43.5                           | 2.56                         | XRD         |
| 14 | 86451           | 3256                 |                   | (striped) pendant?       | <b>chloritite</b>                     | NO <i>greenstone</i> - phyllosilicates are visible (chlorite and micas?) | 163.2             | 102.9                          | 2.71                         | XRD         |
| 15 |                 | 5213                 |                   | axe fragment             | <b>chloritite with magnetite</b>      | ===                                                                      | 52.4              | 33.8                           | 2.82                         | =           |
| 16 |                 | 3018                 |                   | splinter                 | <b>chloritite w/amph., omph., pl.</b> | w/scarse jadeite too; amphibole is actinolite (too small for weighing)   | =                 | =                              | =                            | XRD         |
| 17 |                 | 4932                 |                   | splinter                 | <b>chlorite-schist</b>                | ===                                                                      | 25.7              | 15.7                           | 2.57                         | =           |
| 18 |                 | 461                  | CMIX              | axe fragment             | <b>eclogite</b>                       | presence of various pyroxenes; possible pseudomorphosis on lawsonite     | 65.6              | 46.7                           | 3.47                         | =           |
| 19 | 67151           | 825                  |                   | axe fragment             | <b>eclogite</b>                       | ===                                                                      | 37.5              | 26.5                           | 3.41                         | =           |
| 20 |                 | 2448                 |                   | axe fragment             | <b>eclogite</b>                       | ===                                                                      | 31.8              | 22.6                           | 3.46                         | =           |
| 21 |                 | 3088                 |                   | axe fragment             | <b>eclogite</b>                       | eclogitic domains with atoll-like garnets and sulfides                   | 88.4              | 62.1                           | 3.36                         | XRD/SEM-EDS |
| 22 |                 | 3110                 |                   | chisel fragment          | <b>eclogite</b>                       | lineation marked by rutile or ilmenite                                   | 26.6              | 19.2                           | 3.59                         | =           |
| 23 |                 | 3306                 |                   | axe talon                | <b>eclogite</b>                       | ===                                                                      | 32.8              | 23.2                           | 3.42                         | =           |
| 24 | 67139           | 3529                 |                   | axehead                  | <b>eclogite</b>                       | rich in garnets, with amphibole (dark areas)                             | 67.4              | 48.2                           | 3.51                         | =           |
| 25 |                 | 3772                 |                   | axehead                  | <b>eclogite</b>                       | ===                                                                      | 164.9             | 118.2                          | 3.53                         | =           |
| 26 |                 | 4205                 |                   | axe fragment             | <b>eclogite</b>                       | ===                                                                      | 156.9             | 112.9                          | 3.57                         | =           |
| 27 |                 | 4217                 |                   | small chisel             | <b>eclogite</b>                       | comprehensive of a (apparently modern) groove                            | 11.1              | 8                              | 3.58                         | XRD         |
| 28 |                 | 4321                 |                   | splinter                 | <b>eclogite</b>                       | too small to provide a reliable weighing                                 | =                 | =                              | =                            | =           |
| 29 |                 | 4356                 |                   | axehead/small chisel     | <b>eclogite</b>                       | porphyroblastic garnet                                                   | 58.4              | 41.5                           | 3.46                         | =           |
| 30 |                 | 4637                 |                   | small, elongated axehead | <b>eclogite</b>                       | ===                                                                      | 16.2              | 11.5                           | 3.45                         | =           |

|    |       |      |            |                       |                           |                                                                   |       |       |      |             |
|----|-------|------|------------|-----------------------|---------------------------|-------------------------------------------------------------------|-------|-------|------|-------------|
| 31 |       | 4829 |            | axe roughout          | eclogite                  | big porphyroblastic garnets                                       | 165.9 | 116   | 3.32 | =           |
| 32 | 67157 | 5236 | Museo      | axe fragment          | eclogite                  | ===                                                               | 99.2  | 70.5  | 3.46 | =           |
| 33 |       | 5653 |            | hatchet               | eclogite                  | ===                                                               | 21.4  | 15.4  | 3.57 | XRD/SEM-EDS |
| 34 | 67154 | 5881 |            | axehead               | eclogite                  | ===                                                               | 624.2 | 448.9 | 3.56 | =           |
| 35 | 67150 | 6549 |            | small chisel fragment | eclogite                  | weighing not definitely reliable                                  | 5.4   | 3.8   | 3.38 | =           |
| 36 |       | 7144 |            | axe fragment          | eclogite                  | ===                                                               | 110   | 79    | 3.55 | XRD/SEM-EDS |
| 37 |       | 7254 |            | axe fragment          | eclogite                  | ===                                                               | 36.4  | 26    | 3.50 | =           |
| 38 |       | 8168 |            | axe fragment          | eclogite                  | porphyroblastic garnet                                            | 51.7  | 35.7  | 3.23 | =           |
| 39 |       | 8722 |            | axe talon             | eclogite                  | porphyroblasts of white mica bianca and carbonatic vein (calcite) | 140   | 99.5  | 3.46 | =           |
| 40 |       | 8807 |            | axe talon             | eclogite                  | ===                                                               | 74.3  | 52.8  | 3.46 | =           |
| 41 | 67142 | 8936 |            | axehead fragment      | eclogite                  | presence of jadeite, in addition to omphacite                     | 158.5 | 114.1 | 3.57 | XRD/SEM-EDS |
| 42 |       | 3971 |            | fragment?             | fels w/garnet and biotite | significant amounts of garnet                                     | 64.8  | 45.9  | 3.43 | =           |
| 43 |       | 9273 |            | fragment?             | fels w/garnet and biotite | significant amounts of garnet                                     | 44.7  | 31.8  | 3.47 | =           |
| 44 |       | 1960 |            | ???                   | fels w/garnet and biotite | NO greenstone                                                     | 384.3 | 272.4 | 3.43 | =           |
| 45 |       | 3572 |            | ???                   | fels w/garnet and biotite | NO greenstone                                                     | 273.8 | 191   | 3.31 | =           |
| 46 | 67138 | 4148 |            | axehead               | (jadeitite with albite?)  | apparently marked by darker streaks                               | 97.2  | 66.4  | 3.16 | =           |
| 47 |       | 81   | CMIX       | axe talon             | jadeitite                 | ===                                                               | 269.3 | 184.7 | 3.18 | XRD/SEM-EDS |
| 48 |       | 3788 |            | axe fragment          | jadeitite                 | ===                                                               | 44.4  | 31.1  | 3.34 | XRD/SEM-EDS |
| 49 |       | 7646 |            | axe fragment          | jadeitite                 | ===                                                               | 9.4   | 6.7   | 3.48 | =           |
| 50 |       | 4200 |            | small grindstone?     | marble                    | calcite                                                           | 849.2 | 523.1 | 2.60 | =           |
| 51 |       | 6373 |            | axe fragment          | mixed Na-pyroxenite       | ===                                                               | 14.2  | 9.9   | 3.30 | =           |
| 52 | 67156 | 8    | Museo CMIX | axe fragment          | mixed Na-pyroxenite       | ===                                                               | 149.8 | 102.8 | 3.19 | =           |
| 53 | 67147 | 214  | CMIX       | small chisel fragment | mixed Na-pyroxenite       | presence of vein with pyroxene (jadeite) and rutile               | 15    | 10.6  | 3.41 | =           |
| 54 |       | 579  | CMIX       | axe fragment          | mixed Na-pyroxenite       | presence of zoisite                                               | 18.5  | 12.7  | 3.19 | =           |
| 55 |       | 631  | CMIX       | axehead               | mixed Na-pyroxenite       | ===                                                               | 88.6  | 62.5  | 3.39 | =           |
| 56 |       | 987  |            | axe fragment          | mixed Na-pyroxenite       | jadeite more abundant than omphacite                              | 7.7   | 5.3   | 3.21 | =           |
| 57 |       | 1548 |            | splinter              | mixed Na-pyroxenite       | ===                                                               | 8     | 5.7   | 3.48 | XRD         |
| 58 | 67149 | 2413 |            | chisel                | mixed Na-pyroxenite       | ===                                                               | 62.8  | 44.4  | 3.41 | =           |
| 59 |       | 2809 |            | small chisel fragment | mixed Na-pyroxenite       | presence of light green levels (jadeite), rich in sulfides        | 33.1  | 22.9  | 3.25 | =           |
| 60 | 67143 | 3208 |            | small axehead         | mixed Na-pyroxenite       | ===                                                               | 82.1  | 57.6  | 3.35 | =           |
| 61 |       | 3263 |            | chisel fragment       | mixed Na-pyroxenite       | ===                                                               | 88.8  | 62.6  | 3.39 | =           |
| 62 |       | 3491 |            | axe fragment          | mixed Na-pyroxenite       | ===                                                               | 18.1  | 12.7  | 3.35 | =           |
| 63 |       | 3525 |            | axe fragment          | mixed Na-pyroxenite       | ===                                                               | 25.1  | 17.5  | 3.30 | =           |
| 64 |       | 3664 | CMX        | splinter              | mixed Na-pyroxenite       | too small to provide a reliable weighing                          | =     | =     | =    | =           |

|    |       |                |        |                   |                                  |                                                               |       |       |      |             |
|----|-------|----------------|--------|-------------------|----------------------------------|---------------------------------------------------------------|-------|-------|------|-------------|
| 65 |       | 3891           | CMX    | splinter          | mixed Na-pyroxenite              | jadeite more abundant than omphacite (too small for weighing) | =     | =     | =    | =           |
| 66 |       | 3974           |        | axehead           | mixed Na-pyroxenite              | presence of dark minerals (pyroxene?)                         | 37.9  | 26.9  | 3.45 | =           |
| 67 |       | 4192           |        | axehead           | mixed Na-pyroxenite              | possible presence of quartz                                   | 36.7  | 25.5  | 3.28 | =           |
| 68 |       | 4229           |        | axehead           | mixed Na-pyroxenite              | presence of white crystals                                    | 88.7  | 61.6  | 3.27 | =           |
| 69 | 67146 | 4591           |        | small axehead     | mixed Na-pyroxenite              | ===                                                           | 53.2  | 37.7  | 3.43 | =           |
| 70 | 67159 | 5101           | Museum | axehead           | mixed Na-pyroxenite              | ===                                                           | 48.2  | 33.8  | 3.35 | =           |
| 71 |       | 5163           |        | axe fragment      | mixed Na-pyroxenite              | presence of ilmenite                                          | 18    | 12.6  | 3.33 | =           |
| 72 |       | 5410           |        | axe fragment      | mixed Na-pyroxenite              | presence of chloritoid                                        | 63.1  | 44.4  | 3.37 | =           |
| 73 |       | 6801           |        | axe talon         | mixed Na-pyroxenite              | ===                                                           | 42    | 28.8  | 3.18 | =           |
| 74 |       | 7179           |        | axe fragment      | mixed Na-pyroxenite              | equivalent amounts of jadeite and omphacite                   | 37.1  | 26    | 3.34 | XRD/SEM-EDS |
| 75 | 67158 | 7777           | Museum | axehead           | mixed Na-pyroxenite              | ===                                                           | 69.8  | 49.5  | 3.44 | =           |
| 76 | 67152 | 8213           |        | axe fragment      | mixed Na-pyroxenite              | possible presence of rutile                                   | 44.7  | 31.4  | 3.36 | =           |
| 77 | 67144 | 8771           |        | axe fragment      | mixed Na-pyroxenite              | possible presence of epidote                                  | 46.3  | 32.6  | 3.38 | =           |
| 78 |       | 9342           |        | axe fragment      | mixed Na-pyroxenite              | aggregates of darker pyroxenes (aegirine?)                    | 52.3  | 36.8  | 3.37 | =           |
| 79 |       | 9373           |        | axe fragment      | mixed Na-pyroxenite              | presence of sulfides                                          | 31.5  | 22.4  | 3.46 | =           |
| 80 | 67155 |                | Museum | axehead           | mixed Na-pyroxenite              | ===                                                           | 108.2 | 76    | 3.36 | =           |
| 81 |       | 6636           |        | axe talon         | mixed Na-pyroxenite              | ===                                                           | 110   | 77.5  | 3.38 | XRD/SEM-EDS |
| 82 | 67141 | 5018           |        | small axehead     | mixed Na-pyroxen./eclogite       | ===                                                           | 42.2  | 29.9  | 3.43 | =           |
| 83 |       | 3688           |        | splinter          | mixed Na-pyroxen./eclogite       | jadeite prevailing over omphacite; possible garnets           | 5.9   | 4.1   | 3.28 | =           |
| 84 | 67148 | 3525           |        | small axehead     | omphacitite                      | ===                                                           | 35    | 24.5  | 3.33 | =           |
| 85 |       | 4360           |        | axe fragment      | omphacitite                      | ===                                                           | 55.5  | 39    | 3.36 | XRD/SEM-EDS |
| 86 |       | 6602           |        | splinter          | omphacitite                      | too small to provide a reliable weighing                      | =     | =     | =    | XRD         |
| 87 |       | 6830           |        | axe cutting edge  | omphacitite                      | ===                                                           | 43.1  | 30.3  | 3.37 | XRD         |
| 88 |       | 3975           |        | axe talon         | garnet omphacitite               | ===                                                           | 46.3  | 32.4  | 3.33 | XRD/SEM-EDS |
| 89 |       | 5319           |        | fragment?         | garnet omphacitite               | ===                                                           | 51.5  | 35.9  | 3.30 | XRD/SEM-EDS |
| 90 |       | 7736           |        | axe fragment      | garnet omphacitite               | ===                                                           | 71.6  | 51    | 3.48 | XRD/SEM-EDS |
| 91 |       | Mus. Artillery |        | two-edged axehead | porphyry                         | quartz-porphyry, with rounded quartz crystals; reef rock      | 442.5 | 281.8 | 2.75 | =           |
| 92 |       | 3926           | CMX    | small striker     | prasinite                        | ===                                                           | 5.3   | 3.5   | 2.94 | =           |
| 93 |       | 6996           |        | axe talon         | prasinite                        | ===                                                           | 18.3  | 12.2  | 3.00 | =           |
| 94 |       | 7188           |        | axe talon         | prasinite                        | ===                                                           | 117.4 | 77.4  | 2.94 | =           |
| 95 |       | 6443           |        | axe roughout      | (prasinite?)                     | ===                                                           | 126.6 | 85.6  | 3.09 | =           |
| 96 |       | 3852           |        | mall grindstone?  | quartzite                        | ===                                                           | =     | =     | =    | =           |
| 97 |       | 4239           |        | mall grindstone?  | quartzite                        | presence of carbonates and white mica                         | 552   | 340.5 | 2.61 | =           |
| 98 |       | 5747           |        | axe fragment      | rock w/garnet, plag., pyr., chl. | ===                                                           | 26    | 18    | 3.25 | XRD         |

|     |       |      |        |                         |                                |                                          |      |       |      |     |
|-----|-------|------|--------|-------------------------|--------------------------------|------------------------------------------|------|-------|------|-----|
| 99  |       | 7645 |        | axe fragment            | rock w/omph., grt, chl., amph. | microstructure of an apparent diabase    | 57.8 | 39.8  | 3.21 | XRD |
| 100 |       | 19   | CM     | small axe roughout      | serpentinite                   | ===                                      | 24.9 | 15.3  | 2.59 | =   |
| 101 |       | 341  | CMIX   | axe roughout            | serpentinite                   | ===                                      | 47.1 | 29.3  | 2.65 | =   |
| 102 |       | 588  |        | splinter                | serpentinite                   | too small to provide a reliable weighing | =    | =     | =    | =   |
| 103 |       | 1758 |        | small striker           | serpentinite                   | ===                                      | 12.1 | 6.8   | 2.28 | =   |
| 104 |       | 1828 |        | small pebble (glued)    | serpentinite                   | ===                                      | 5    | 2.4   | 1.92 | =   |
| 105 |       | 1922 |        | fragment?               | serpentinite                   | ===                                      | 10.7 | 6.8   | 2.74 | =   |
| 106 |       | 3087 |        | pebble?                 | serpentinite                   | ===                                      | 21.4 | 13.4  | 2.68 | =   |
| 107 |       | 3183 |        | small axe roughout      | serpentinite                   | ===                                      | 22.3 | 13.5  | 2.53 | =   |
| 108 |       | 3228 |        | pebble                  | serpentinite                   | ===                                      | 95.8 | 60    | 2.68 | =   |
| 109 |       | 3295 |        | small axehead           | serpentinite                   | ===                                      | 17.2 | 10.9  | 2.73 | =   |
| 110 |       | 3320 |        | axe fragment            | serpentinite                   | ===                                      | 7.4  | 4.6   | 2.64 | =   |
| 111 |       | 3381 |        | pebble                  | serpentinite                   | ===                                      | 18.8 | 11.1  | 2.44 | =   |
| 112 | 67140 | 3600 |        | axehead                 | serpentinite                   | ===                                      | 299  | 186.7 | 2.66 | =   |
| 113 |       | 3619 |        | splinter                | serpentinite                   | too small to provide a reliable weighing | =    | =     | =    | =   |
| 114 |       | 3666 |        | small splinter fragment | serpentinite                   | serpentine schist                        | 9.4  | 5.8   | 2.61 | =   |
| 115 |       | 3763 |        | splinter                | serpentinite                   | too small to provide a reliable weighing | =    | =     | =    | =   |
| 116 |       | 3925 |        | small striker           | serpentinite                   | ===                                      | 33.6 | 19.6  | 2.40 | =   |
| 117 |       | 3941 |        | splinter                | serpentinite                   | too small to provide a reliable weighing | =    | =     | =    | =   |
| 118 |       | 4022 |        | small striker           | serpentinite                   | ===                                      | 9.3  | 5.3   | 2.33 | =   |
| 119 | 67160 | 4489 | Museum | taw                     | serpentinite                   | ===                                      | 26.9 | 15.8  | 2.42 | =   |
| 120 |       | 4600 |        | small chisel fragment   | serpentinite                   | serpentine schist                        | 10.5 | 6.5   | 2.63 | =   |
| 121 |       | 5030 |        | taw                     | serpentinite                   | ===                                      | 18.6 | 11.2  | 2.51 | =   |
| 122 | 67161 | 5117 | Museum | taw                     | serpentinite                   | ===                                      | 34.8 | 21.6  | 2.64 | =   |
| 123 |       | 5515 |        | small chisel            | serpentinite                   | fibrous antigorite                       | 8.8  | 5.3   | 2.51 | XRD |
| 124 |       | 5595 |        | small striker           | serpentinite                   | ===                                      | 32.2 | 19    | 2.44 | =   |
| 125 |       | 5624 |        | small chisel fragment   | serpentinite                   | ===                                      | 20   | 12.3  | 2.60 | =   |
| 126 |       | 6174 |        | pebble                  | serpentinite                   | ===                                      | 16   | 8.9   | 2.25 | =   |
| 127 |       | 6232 |        | talon axe               | serpentinite                   | ===                                      | 92.4 | 57.7  | 2.66 | =   |
| 128 |       | 6389 |        | pebble?                 | serpentinite                   | ===                                      | 13.7 | 8.5   | 2.63 | =   |
| 129 |       | 7217 |        | ???                     | serpentinite                   | ===                                      | 8.8  | 5.2   | 2.44 | =   |
| 130 |       | 7321 |        | axe fragment            | serpentinite                   | ===                                      | 45.9 | 28.6  | 2.65 | =   |
| 131 | 67153 | 7648 |        | axe fragment            | serpentinite                   | ===                                      | 53.7 | 32.6  | 2.55 | =   |
| 132 |       | 2455 |        | splinter                | (serpentinite?)                | too small to provide a reliable weighing | =    | =     | =    | =   |

5  
6 **Table S1.** Inventory codes, label, typology, preliminary lithotype determination and density values of the 132 polished stone implements and artefacts coming from the  
7 archaeological site of Chiomonte, based on density measurements and stereo-microscopy observations in reflected light of the tools polished or raw surfaces; the  
8 subsequent, more in-depth analytical treatments are also indicated. The background colour in the 'Implement function' column indicates the typology of the artefact,  
9 according to the following codes: i) Instruments for cutting, **YELLOW** (axes) and **ORANGE** (chisels and hatchets); ii) Instruments for striking, **RED** (strickers); iii)  
10 Instruments with ornamental purposes, **GREEN** (pendants and taws); iv) Instruments for abrading, **PURPLE** (millstones and grindstones); v) **BLUE**, **Fragments,**  
11 **roughouts, splinters and pebbles;** vi) **WHITE**, unidentified.  
12  
13  
14  
15  
16  
17  
18  
19  
20  
21  
22  
23  
24  
25  
26  
27

28 **ARCHAEOLOGICAL IMPLEMENTS**29 Selected spot chemical analyses of clinopyroxenes and garnets by EDS (**detection threshold for oxides: 0.05 %; the**  
30 **symbol “=” indicates “under the detection limit”**).

31

32 **Na-PYROXENE ROCKS**33 **Jadeitites**34 Sample (thin section): **3788**

| <b>Clinopyroxenes</b>               |          |          |          |          |          |          |          |          |          |           |
|-------------------------------------|----------|----------|----------|----------|----------|----------|----------|----------|----------|-----------|
| <b>Oxides (wt %)</b>                | <b>1</b> | <b>2</b> | <b>3</b> | <b>4</b> | <b>5</b> | <b>6</b> | <b>7</b> | <b>8</b> | <b>9</b> | <b>10</b> |
| SiO <sub>2</sub>                    | 58.55    | 57.76    | 57.60    | 57.65    | 56.39    | 56.00    | 58.90    | 58.30    | 58.09    | 57.61     |
| TiO <sub>2</sub>                    | =        | =        | 0.79     | =        | =        | =        | =        | =        | =        | =         |
| Cr <sub>2</sub> O <sub>3</sub>      | =        | =        | =        | =        | =        | =        | =        | =        | =        | =         |
| Al <sub>2</sub> O <sub>3</sub>      | 20.48    | 18.93    | 19.00    | 17.64    | 12.90    | 13.27    | 20.42    | 20.28    | 19.21    | 16.75     |
| Fe <sub>2</sub> O <sub>3</sub>      | 1.10     | 2.89     | 2.79     | 2.19     | 5.44     | 7.35     | 0.12     | =        | 3.04     | 4.25      |
| FeO                                 | 4.00     | 3.36     | 3.19     | 6.01     | 4.60     | 2.07     | 4.91     | 5.07     | 3.85     | 4.94      |
| MnO                                 | =        | =        | =        | =        | =        | =        | =        | =        | =        | =         |
| MgO                                 | 0.78     | 1.20     | 1.17     | 1.06     | 3.41     | 3.93     | 0.79     | 0.73     | 0.92     | 1.20      |
| NiO                                 | =        | =        | =        | =        | =        | =        | =        | =        | =        | =         |
| CaO                                 | 1.98     | 2.82     | 2.06     | 3.38     | 6.87     | 6.71     | 1.98     | 2.02     | 2.12     | 2.68      |
| Na <sub>2</sub> O                   | 13.39    | 12.93    | 13.3     | 12.23    | 10.34    | 10.63    | 13.28    | 13.07    | 13.21    | 12.59     |
| K <sub>2</sub> O                    | =        | =        | =        | =        | =        | =        | =        | =        | =        | =         |
| <b>Total</b>                        | 100.28   | 99.89    | 99.90    | 100.16   | 99.96    | 99.97    | 100.4    | 99.47    | 100.44   | 100.02    |
| <b>Cations (based on 6 oxygens)</b> |          |          |          |          |          |          |          |          |          |           |
| Si                                  | 2.017    | 2.010    | 2.002    | 2.022    | 2.013    | 1.99     | 2.027    | 2.027    | 2.0118   | 2.026     |
| Ti                                  | 0        | 0        | 0.021    | 0        | 0        | 0        | 0        | 0        | 0        | 0         |
| Cr                                  | 0        | 0        | 0        | 0        | 0        | 0        | 0        | 0        | 0        | 0         |
| Al                                  | 0.832    | 0.777    | 0.778    | 0.729    | 0.543    | 0.556    | 0.828    | 0.831    | 0.784    | 0.694     |
| Fe <sup>3+</sup>                    | 0.029    | 0.076    | 0.073    | 0.058    | 0.146    | 0.197    | 0.003    | 0        | 0.079    | 0.1124    |
| Fe <sup>2+</sup>                    | 0.115    | 0.098    | 0.093    | 0.176    | 0.138    | 0.062    | 0.141    | 0.147    | 0.112    | 0.145     |
| Mn                                  | 0        | 0        | 0        | 0        | 0        | 0        | 0        | 0        | 0        | 0         |
| Mg                                  | 0.040    | 0.062    | 0.061    | 0.055    | 0.182    | 0.208    | 0.041    | 0.038    | 0.048    | 0.063     |
| Ni                                  | 0        | 0        | 0        | 0        | 0        | 0        | 0        | 0        | 0        | 0         |
| Ca                                  | 0.073    | 0.105    | 0.077    | 0.127    | 0.263    | 0.256    | 0.073    | 0.075    | 0.079    | 0.101     |
| Na                                  | 0.894    | 0.873    | 0.896    | 0.832    | 0.716    | 0.732    | 0.886    | 0.881    | 0.887    | 0.858     |
| K                                   | 0        | 0        | 0        | 0        | 0        | 0        | 0        | 0        | 0        | 0         |
| <b>End-members</b>                  |          |          |          |          |          |          |          |          |          |           |
| Wollastonite                        | 0.037    | 0.053    | 0.038    | 0.064    | 0.131    | 0.123    | 0.037    | 0.038    | 0.039    | 0.05      |
| Enstatite                           | 0.02     | 0.031    | 0.03     | 0.028    | 0.091    | 0.104    | 0.02     | 0.019    | 0.024    | 0.031     |
| Ferrosilite                         | 0.058    | 0.049    | 0.046    | 0.088    | 0.069    | 0.031    | 0.071    | 0.074    | 0.056    | 0.073     |
| Pyroxmangite                        | =        | =        | =        | =        | =        | =        | =        | =        | =        | =         |
| Aegirine                            | 0.029    | 0.076    | 0.073    | 0.058    | 0.146    | 0.197    | 0.003    | 0        | 0.079    | 0.112     |
| Jadeite                             | 0.832    | 0.776    | 0.778    | 0.729    | 0.543    | 0.536    | 0.828    | 0.831    | 0.784    | 0.694     |
| CaAl <sub>2</sub> SiO <sub>6</sub>  | =        | =        | =        | =        | =        | 0.01     | =        | =        | =        | =         |
| CaFeAlSiO <sub>6</sub>              | =        | =        | =        | =        | =        | =        | =        | =        | =        | =         |
| CaCrAlSiO <sub>6</sub>              | =        | =        | =        | =        | =        | =        | =        | =        | =        | =         |
| CaTiAl <sub>2</sub> O <sub>6</sub>  | =        | =        | =        | =        | =        | =        | =        | =        | =        | =         |

35 **Table S2**

36

37

38

39

40

41

42

43

44

45

46

47 Sample (thin section): (CMIX) 81

| <b>Clinopyroxenes</b>               |              |              |               |              |              |              |               |               |              |              |
|-------------------------------------|--------------|--------------|---------------|--------------|--------------|--------------|---------------|---------------|--------------|--------------|
| <b>Oxides (wt %)</b>                | <b>1</b>     | <b>2</b>     | <b>3</b>      | <b>4</b>     | <b>5</b>     | <b>6</b>     | <b>7</b>      | <b>8</b>      | <b>9</b>     | <b>10</b>    |
| SiO <sub>2</sub>                    | 59.27        | 56.25        | 60.14         | 58.59        | 59.51        | 59.23        | 59.26         | 58.9          | 57.45        | 56.6         |
| TiO <sub>2</sub>                    | =            | =            | =             | =            | =            | 0.33         | =             | =             | =            | =            |
| Cr <sub>2</sub> O <sub>3</sub>      | =            | =            | =             | =            | =            | =            | =             | =             | =            | =            |
| Al <sub>2</sub> O <sub>3</sub>      | 22.99        | 8.41         | 24.13         | 19.33        | 23.63        | 22.45        | 21.12         | 20.51         | 13.12        | 12.16        |
| Fe <sub>2</sub> O <sub>3</sub>      | =            | 6.22         | =             | =            | =            | =            | =             | =             | =            | 0.54         |
| FeO                                 | 1.47         | 5.14         | =             | 1.20         | 0.62         | 0.47         | 1.08          | 0.90          | 2.28         | 3.65         |
| MnO                                 | =            | =            | =             | =            | =            | =            | =             | =             | =            | =            |
| MgO                                 | 0.56         | 5.59         | 0.96          | 3.65         | 0.97         | 1.66         | 2.45          | 2.87          | 7.37         | 7.00         |
| NiO                                 | =            | =            | =             | =            | =            | =            | =             | =             | =            | =            |
| CaO                                 | 0.99         | 8.86         | 1.45          | 5.65         | 0.97         | 2.35         | 4.01          | 4.63          | 11.33        | 11.43        |
| Na <sub>2</sub> O                   | 13.85        | 8.80         | 13.61         | 11.22        | 13.82        | 13.00        | 12.30         | 12.20         | 8.30         | 7.96         |
| K <sub>2</sub> O                    | =            | =            | =             | =            | =            | =            | =             | =             | =            | =            |
| <b>Total</b>                        | <b>99.13</b> | <b>99.27</b> | <b>100.29</b> | <b>99.64</b> | <b>99.52</b> | <b>99.49</b> | <b>100.22</b> | <b>100.01</b> | <b>99.85</b> | <b>99.34</b> |
| <b>Cations (based on 6 oxygens)</b> |              |              |               |              |              |              |               |               |              |              |
| Si                                  | 2.038        | 2.045        | 2.040         | 2.027        | 2.032        | 2.033        | 2.0290        | 2.019         | 2.015        | 2.012        |
| Ti                                  | 0            | 0            | 0             | 0            | 0            | 0.009        | 0             | 0             | 0            | 0            |
| Cr                                  | 0            | 0            | 0             | 0            | 0            | 0            | 0             | 0             | 0            | 0            |
| Al                                  | 0.932        | 0.360        | 0.964         | 0.788        | 0.951        | 0.908        | 0.852         | 0.828         | 0.542        | 0.510        |
| Fe <sup>3+</sup>                    | 0            | 0.170        | 0             | 0            | 0            | 0            | 0             | 0             | 0            | 0.015        |
| Fe <sup>2+</sup>                    | 0.042        | 0.156        | 0             | 0.035        | 0.018        | 0.014        | 0.031         | 0.026         | 0.067        | 0.109        |
| Mn                                  | 0            | 0            | 0             | 0            | 0            | 0            | 0             | 0             | 0            | 0            |
| Mg                                  | 0.029        | 0.303        | 0.049         | 0.188        | 0.049        | 0.085        | 0.125         | 0.147         | 0.385        | 0.371        |
| Ni                                  | 0            | 0            | 0             | 0            | 0            | 0            | 0             | 0             | 0            | 0            |
| Ca                                  | 0.037        | 0.345        | 0.053         | 0.210        | 0.036        | 0.086        | 0.147         | 0.170         | 0.426        | 0.435        |
| Na                                  | 0.923        | 0.620        | 0.895         | 0.753        | 0.915        | 0.865        | 0.816         | 0.811         | 0.565        | 0.549        |
| K                                   | 0            | 0            | 0             | 0            | 0            | 0            | 0             | 0             | 0            | 0            |
| <b>End-members</b>                  |              |              |               |              |              |              |               |               |              |              |
| Wollastonite                        | 0.018        | 0.173        | 0.026         | 0.105        | 0.018        | 0.043        | 0.074         | 0.085         | 0.213        | 0.218        |
| Enstatite                           | 0.014        | 0.151        | 0.024         | 0.094        | 0.025        | 0.042        | 0.063         | 0.073         | 0.193        | 0.185        |
| Ferrosilite                         | 0.021        | 0.078        | 0             | 0.017        | 0.009        | 0.007        | 0.015         | 0.013         | 0.033        | 0.054        |
| Pyroxmangite                        | =            | =            | =             | =            | =            | =            | =             | =             | =            | =            |
| Aegirine                            | =            | 0.17         | =             | =            | =            | =            | =             | =             | =            | 0.015        |
| Jadeite                             | 0.923        | 0.36         | 0.895         | 0.753        | 0.915        | 0.865        | 0.816         | 0.811         | 0.542        | 0.51         |
| CaAl <sub>2</sub> SiO <sub>6</sub>  | =            | =            | =             | =            | =            | =            | =             | =             | =            | =            |
| CaFeAlSiO <sub>6</sub>              | =            | =            | =             | =            | =            | =            | =             | =             | =            | =            |
| CaCrAlSiO <sub>6</sub>              | =            | =            | =             | =            | =            | =            | =             | =             | =            | =            |
| CaTiAl <sub>2</sub> O <sub>6</sub>  | =            | =            | =             | =            | =            | =            | =             | =             | =            | =            |

Table S3

48  
49  
50  
51  
52  
53  
54  
55  
56  
57  
58  
59  
60  
61  
62  
63  
64  
65  
66  
67



68 **Omphacitite**69 Sample (thin section): **4360**

| <b>Clinopyroxenes</b>               |              |              |              |              |             |              |              |              |              |              |
|-------------------------------------|--------------|--------------|--------------|--------------|-------------|--------------|--------------|--------------|--------------|--------------|
| <b>Oxides (wt %)</b>                | <b>1</b>     | <b>2</b>     | <b>3</b>     | <b>4</b>     | <b>5</b>    | <b>6</b>     | <b>7</b>     | <b>8</b>     | <b>9</b>     | <b>10</b>    |
| SiO <sub>2</sub>                    | 53.50        | 54.34        | 54.09        | 54.40        | 54.26       | 53.30        | 55.03        | 54.69        | 54.71        | 54.65        |
| TiO <sub>2</sub>                    | =            | =            | =            | =            | =           | =            | =            | =            | =            | 0.34         |
| Cr <sub>2</sub> O <sub>3</sub>      | =            | =            | =            | =            | =           | =            | =            | =            | =            | =            |
| Al <sub>2</sub> O <sub>3</sub>      | 7.71         | 10.66        | 7.59         | 10.5         | 10.91       | 8.80         | 11.04        | 10.06        | 11.56        | 11.79        |
| Fe <sub>2</sub> O <sub>3</sub>      | 13.28        | 10.10        | 5.80         | 7.10         | 7.52        | 8.82         | 7.52         | 6.86         | 6.65         | 8.12         |
| FeO                                 | =            | =            | =            | 3.92         | 2.33        | 4.12         | =            | 0.03         | 0.15         | 0.50         |
| MnO                                 | =            | =            | =            | =            | =           | =            | =            | =            | =            | =            |
| MgO                                 | 5.54         | 5.16         | 9.88         | 4.24         | 4.83        | 4.62         | 6.47         | 7.43         | 6.27         | 5.09         |
| NiO                                 | =            | =            | =            | =            | =           | =            | =            | =            | =            | =            |
| CaO                                 | 8.91         | 8.14         | 15.25        | 9.42         | 9.42        | 10.93        | 9.79         | 11.3         | 9.87         | 8.56         |
| Na <sub>2</sub> O                   | 9.28         | 9.79         | 6.07         | 8.95         | 9.03        | 8.06         | 9.24         | 8.12         | 8.94         | 9.73         |
| K <sub>2</sub> O                    | =            | =            | =            | =            | =           | =            | =            | =            | =            | =            |
| <b>Total</b>                        | <b>98.22</b> | <b>98.19</b> | <b>98.68</b> | <b>98.53</b> | <b>98.3</b> | <b>98.65</b> | <b>99.09</b> | <b>98.49</b> | <b>98.15</b> | <b>98.78</b> |
| <b>Cations (based on 6 oxygens)</b> |              |              |              |              |             |              |              |              |              |              |
| Si                                  | 1.975        | 1.978        | 1.963        | 1.993        | 1.982       | 1.974        | 1.970        | 1.977        | 1.977        | 1.970        |
| Ti                                  | 0            | 0            | 0            | 0            | 0           | 0            | 0            | 0            | 0            | 0.009        |
| Cr                                  | 0            | 0            | 0            | 0            | 0           | 0            | 0            | 0            | 0            | 0            |
| Al                                  | 0.335        | 0.457        | 0.325        | 0.454        | 0.470       | 0.384        | 0.4660       | 0.429        | 0.492        | 0.501        |
| Fe <sup>3+</sup>                    | 0.369        | 0.277        | 0.158        | 0.196        | 0.207       | 0.246        | 0.203        | 0.187        | 0.181        | 0.220        |
| Fe <sup>2+</sup>                    | 0            | 0            | 0            | 0.120        | 0.071       | 0.128        | 0            | 0.001        | 0.004        | 0.015        |
| Mn                                  | 0            | 0            | 0            | 0            | 0           | 0            | 0            | 0            | 0            | 0            |
| Mg                                  | 0.305        | 0.280        | 0.534        | 0.232        | 0.263       | 0.255        | 0.345        | 0.400        | 0.338        | 0.274        |
| Ni                                  | 0            | 0            | 0            | 0            | 0           | 0            | 0            | 0            | 0            | 0            |
| Ca                                  | 0.352        | 0.317        | 0.593        | 0.370        | 0.369       | 0.434        | 0.375        | 0.438        | 0.382        | 0.331        |
| Na                                  | 0.664        | 0.691        | 0.427        | 0.636        | 0.639       | 0.579        | 0.641        | 0.569        | 0.626        | 0.680        |
| K                                   | 0            | 0            | 0            | 0            | 0           | 0            | 0            | 0            | 0            | 0            |
| <b>End-members</b>                  |              |              |              |              |             |              |              |              |              |              |
| Wollastonite                        | 0.169        | 0.148        | 0.287        | 0.182        | 0.175       | 0.204        | 0.188        | 0.207        | 0.179        | 0.155        |
| Enstatite                           | 0.152        | 0.14         | 0.267        | 0.116        | 0.131       | 0.128        | 0.173        | 0.2          | 0.169        | 0.137        |
| Ferrosilite                         | =            | =            | =            | 0.06         | 0.036       | 0.064        | =            | =            | 0.002        | 0.008        |
| Pyroxmangite                        | =            | =            | =            | =            | =           | =            | =            | =            | =            | =            |
| Aegirine                            | 0.369        | 0.277        | 0.158        | 0.196        | 0.207       | 0.246        | 0.203        | 0.187        | 0.181        | 0.22         |
| Jadeite                             | 0.295        | 0.414        | 0.269        | 0.44         | 0.433       | 0.333        | 0.435        | 0.382        | 0.445        | 0.46         |
| CaAl <sub>2</sub> SiO <sub>6</sub>  | 0.015        | 0.021        | 0.019        | 0.007        | 0.018       | 0.026        | =            | 0.023        | 0.023        | 0.011        |
| CaFeAlSiO <sub>6</sub>              | =            | =            | =            | =            | =           | =            | =            | =            | =            | =            |
| CaCrAlSiO <sub>6</sub>              | =            | =            | =            | =            | =           | =            | =            | =            | =            | =            |
| CaTiAl <sub>2</sub> O <sub>6</sub>  | =            | =            | =            | =            | =           | =            | =            | =            | =            | 0.009        |

**Table S4**

70  
71  
72  
73  
74  
75  
76  
77  
78  
79  
80  
81  
82  
83  
84  
85  
86  
87

88 **Mixed Na-pyroxenites**89 Sample (thin section): **6636**

| <b>Clinopyroxenes</b>               |          |          |          |          |          |          |          |          |          |           |
|-------------------------------------|----------|----------|----------|----------|----------|----------|----------|----------|----------|-----------|
| <b>Oxides (wt %)</b>                | <b>1</b> | <b>2</b> | <b>3</b> | <b>4</b> | <b>5</b> | <b>6</b> | <b>7</b> | <b>8</b> | <b>9</b> | <b>10</b> |
| SiO <sub>2</sub>                    | 58.50    | 58.35    | 58.91    | 58.78    | 58.01    | 56.32    | 56.60    | 56.44    | 56.29    | 59.08     |
| TiO <sub>2</sub>                    | =        | =        | =        | =        | =        | =        | =        | =        | =        | =         |
| Cr <sub>2</sub> O <sub>3</sub>      | =        | =        | =        | =        | =        | =        | =        | =        | =        | =         |
| Al <sub>2</sub> O <sub>3</sub>      | 20.34    | 20.49    | 22.17    | 21.23    | 21.22    | 13.59    | 14.53    | 12.90    | 13.57    | 22.67     |
| Fe <sub>2</sub> O <sub>3</sub>      | 0.57     | =        | =        | =        | 1.08     | 9.13     | 7.74     | 3.28     | 7.82     | =         |
| FeO                                 | 4.26     | 4.38     | 3.56     | 4.52     | 3.49     | 2.56     | 3.93     | 4.62     | 3.93     | 3.19      |
| MnO                                 | =        | =        | =        | =        | =        | =        | =        | =        | =        | =         |
| MgO                                 | 0.82     | 0.81     | 0.47     | 0.50     | 0.62     | 2.29     | 1.94     | 4.63     | 2.54     | 0.52      |
| NiO                                 | =        | =        | =        | =        | =        | =        | =        | =        | =        | =         |
| CaO                                 | 1.93     | 2.16     | 1.48     | 1.25     | 1.44     | 4.35     | 3.92     | 9.01     | 4.53     | 1.18      |
| Na <sub>2</sub> O                   | 13.32    | 13.16    | 13.63    | 13.61    | 13.57    | 11.89    | 11.92    | 9.29     | 11.44    | 13.84     |
| K <sub>2</sub> O                    | =        | =        | =        | =        | =        | =        | =        | =        | =        | =         |
| <b>Total</b>                        | 99.74    | 99.35    | 100.22   | 99.89    | 99.44    | 100.12   | 100.58   | 100.17   | 100.12   | 100.48    |
| <b>Cations (based on 6 oxygens)</b> |          |          |          |          |          |          |          |          |          |           |
| Si                                  | 2.025    | 2.026    | 2.019    | 2.026    | 2.008    | 2.003    | 2.003    | 2.006    | 2.005    | 2.014     |
| Ti                                  | 0        | 0        | 0        | 0        | 0        | 0        | 0        | 0        | 0        | 0         |
| Cr                                  | 0        | 0        | 0        | 0        | 0        | 0        | 0        | 0        | 0        | 0         |
| Al                                  | 0.830    | 0.839    | 0.895    | 0.862    | 0.866    | 0.570    | 0.606    | 0.540    | 0.570    | 0.911     |
| Fe <sup>3+</sup>                    | 0.015    | 0        | 0        | 0        | 0.028    | 0.244    | 0.206    | 0.088    | 0.210    | 0         |
| Fe <sup>2+</sup>                    | 0.123    | 0.127    | 0.102    | 0.130    | 0.101    | 0.076    | 0.116    | 0.137    | 0.117    | 0.091     |
| Mn                                  | 0        | 0        | 0        | 0        | 0        | 0        | 0        | 0        | 0        | 0         |
| Mg                                  | 0.042    | 0.0420   | 0.024    | 0.026    | 0.032    | 0.121    | 0.102    | 0.245    | 0.135    | 0.026     |
| Ni                                  | 0        | 0        | 0        | 0        | 0        | 0        | 0        | 0        | 0        | 0         |
| Ca                                  | 0.072    | 0.080    | 0.054    | 0.046    | 0.053    | 0.166    | 0.149    | 0.343    | 0.173    | 0.043     |
| Na                                  | 0.894    | 0.89     | 0.906    | 0.910    | 0.911    | 0.820    | 0.818    | 0.640    | 0.790    | 0.915     |
| K                                   | 0        | 0        | 0        | 0        | 0        | 0        | 0        | 0        | 0        | 0         |
| <b>End-members</b>                  |          |          |          |          |          |          |          |          |          |           |
| Wollastonite                        | 0.036    | 0.04     | 0.027    | 0.023    | 0.027    | 0.083    | 0.074    | 0.172    | 0.086    | 0.022     |
| Enstatite                           | 0.021    | 0.021    | 0.012    | 0.013    | 0.016    | 0.061    | 0.051    | 0.123    | 0.067    | 0.013     |
| Ferrosilite                         | 0.062    | 0.064    | 0.051    | 0.065    | 0.051    | 0.038    | 0.058    | 0.069    | 0.059    | 0.045     |
| Pyroxmangite                        | =        | =        | =        | =        | =        | =        | =        | =        | =        | =         |
| Aegirine                            | 0.015    | =        | =        | =        | 0.028    | 0.244    | 0.206    | 0.088    | 0.21     | =         |
| Jadeite                             | 0.83     | 0.839    | 0.895    | 0.862    | 0.866    | 0.57     | 0.606    | 0.54     | 0.57     | 0.911     |
| CaAl <sub>2</sub> SiO <sub>6</sub>  | =        | =        | =        | =        | =        | =        | =        | =        | =        | =         |
| CaFeAlSiO <sub>6</sub>              | =        | =        | =        | =        | =        | =        | =        | =        | =        | =         |
| CaCrAlSiO <sub>6</sub>              | =        | =        | =        | =        | =        | =        | =        | =        | =        | =         |
| CaTiAl <sub>2</sub> O <sub>6</sub>  | =        | =        | =        | =        | =        | =        | =        | =        | =        | =         |

**Table S5**

90  
91  
92  
93  
94  
95  
96  
97  
98  
99  
100  
101  
102  
103  
104  
105  
106  
107

108 Sample (thin section): 7179

| <b>Clinopyroxenes</b>               |              |               |               |              |               |              |              |              |               |              |
|-------------------------------------|--------------|---------------|---------------|--------------|---------------|--------------|--------------|--------------|---------------|--------------|
| <b>Oxides (wt %)</b>                | <b>1</b>     | <b>2</b>      | <b>3</b>      | <b>4</b>     | <b>5</b>      | <b>6</b>     | <b>7</b>     | <b>8</b>     | <b>9</b>      | <b>10</b>    |
| SiO <sub>2</sub>                    | 56.40        | 57.91         | 57.68         | 57.12        | 57.58         | 56.62        | 58.20        | 57.46        | 57.72         | 57.17        |
| TiO <sub>2</sub>                    | 0.11         | 0.20          | 0.11          | =            | =             | 0.07         | 0.20         | =            | 0.17          | =            |
| Cr <sub>2</sub> O <sub>3</sub>      | =            | =             | =             | =            | =             | =            | =            | =            | =             | =            |
| Al <sub>2</sub> O <sub>3</sub>      | 19.84        | 22.19         | 21.57         | 22.57        | 20.16         | 17.07        | 22.64        | 23.31        | 16.82         | 19.09        |
| Fe <sub>2</sub> O <sub>3</sub>      | 5.03         | 3.14          | 2.60          | 3.18         | 5.02          | 5.86         | 1.83         | 2.38         | 5.87          | 5.26         |
| FeO                                 | =            | =             | 0.08          | =            | =             | =            | 0.63         | =            | =             | 0.13         |
| MnO                                 | =            | =             | =             | =            | =             | =            | =            | =            | =             | =            |
| MgO                                 | 1.29         | 0.37          | 1.52          | 0.30         | 1.09          | 2.57         | 0.38         | 0.01         | 2.60          | 1.57         |
| NiO                                 | =            | =             | =             | =            | =             | =            | =            | =            | =             | =            |
| CaO                                 | 2.26         | 1.29          | 2.66          | 1.05         | 2.13          | 4.61         | 1.11         | 0.52         | 4.39          | 2.82         |
| Na <sub>2</sub> O                   | 14.70        | 15.25         | 13.96         | 14.36        | 14.26         | 13.07        | 14.46        | 14.81        | 13.18         | 13.75        |
| K <sub>2</sub> O                    | =            | =             | =             | =            | =             | =            | =            | 0.13         | =             | =            |
| <b>Total</b>                        | <b>99.68</b> | <b>100.35</b> | <b>100.18</b> | <b>98.63</b> | <b>100.25</b> | <b>99.86</b> | <b>99.44</b> | <b>98.63</b> | <b>100.74</b> | <b>99.80</b> |
| <b>Cations (based on 6 oxygens)</b> |              |               |               |              |               |              |              |              |               |              |
| Si                                  | 1.963        | 1.979         | 1.974         | 1.978        | 1.983         | 1.980        | 1.994        | 1.983        | 1.997         | 1.985        |
| Ti                                  | 0.003        | 0.005         | 0.003         | 0.001        | 0             | 0.002        | 0.005        | 0            | 0.004         | 0            |
| Cr                                  | 0            | 0             | 0             | 0            | 0             | 0            | 0            | 0            | 0             | 0            |
| Al                                  | 0.814        | 0.894         | 0.870         | 0.921        | 0.818         | 0.704        | 0.914        | 0.948        | 0.686         | 0.781        |
| Fe <sup>3+</sup>                    | 0.132        | 0.081         | 0.067         | 0.083        | 0.130         | 0.154        | 0.047        | 0.062        | 0.153         | 0.138        |
| Fe <sup>2+</sup>                    | 0.001        | 0             | 0.002         | 0.001        | 0             | 0            | 0.018        | 0            | 0             | 0.004        |
| Mn                                  | 0            | 0             | 0             | 0            | 0             | 0            | 0            | 0            | 0             | 0            |
| Mg                                  | 0.067        | 0.019         | 0.077         | 0.016        | 0.056         | 0.134        | 0.020        | 0.001        | 0.134         | 0.081        |
| Ni                                  | 0            | 0             | 0             | 0            | 0             | 0            | 0            | 0            | 0             | 0            |
| Ca                                  | 0.084        | 0.047         | 0.098         | 0.039        | 0.079         | 0.173        | 0.041        | 0.019        | 0.163         | 0.105        |
| Na                                  | 0.992        | 1.010         | 0.927         | 0.964        | 0.952         | 0.886        | 0.961        | 0.991        | 0.884         | 0.926        |
| K                                   | 0            | 0             | 0             | 0            | 0             | 0            | 0            | 0.006        | 0             | 0            |
| <b>End-members</b>                  |              |               |               |              |               |              |              |              |               |              |
| Wollastonite                        | 0.039        | 0.021         | 0.047         | 0.010        | 0.039         | 0.085        | 0.019        | 0.010        | 0.079         | 0.052        |
| Enstatite                           | 0.032        | 0.009         | 0.036         | 0.007        | 0.028         | 0.066        | 0.010        | 0            | 0.067         | 0.037        |
| Ferrosilite                         | =            | =             | =             | =            | =             | =            | 0.009        | =            | =             | =            |
| Pyroxmangite                        | =            | =             | =             | =            | =             | =            | =            | =            | =             | =            |
| Aegirine                            | 0.130        | 0.08          | 0.067         | 0.083        | 0.130         | 0.153        | 0.047        | 0.062        | 0.152         | 0.137        |
| Jadeite                             | 0.739        | 0.848         | 0.834         | 0.881        | 0.789         | 0.662        | 0.909        | 0.924        | 0.668         | 0.755        |
| CaAl <sub>2</sub> SiO <sub>6</sub>  | =            | =             | =             | 0.018        | =             | =            | =            | =            | =             | =            |
| CaFeAlSiO <sub>6</sub>              | =            | =             | =             | =            | =             | =            | =            | =            | =             | =            |
| CaCrAlSiO <sub>6</sub>              | =            | =             | =             | =            | =             | =            | =            | =            | =             | =            |
| CaTiAl <sub>2</sub> O <sub>6</sub>  | 0.003        | 0.005         | 0.003         | 0.001        | =             | 0.002        | 0.003        | =            | 0.004         | =            |

109 **Table S6**

110

111

112

113

114

115

116

117

118

119

120

121

122

123

124

125

126 **Na-PYROXENE + GARNET ROCKS**127 **Eclogites**

128

129 Sample (thin section): **3088**

| <b>Clinopyroxenes</b>               |               |               |               |               |               |              |               |              |              |              |
|-------------------------------------|---------------|---------------|---------------|---------------|---------------|--------------|---------------|--------------|--------------|--------------|
| Oxides (wt %)                       | <b>1</b>      | <b>2</b>      | <b>3</b>      | <b>4</b>      | <b>5</b>      | <b>6</b>     | <b>7</b>      | <b>8</b>     | <b>9</b>     | <b>10</b>    |
| SiO <sub>2</sub>                    | 56.87         | 56.18         | 56.89         | 57.65         | 56.24         | 57.46        | 58.52         | 56.83        | 56.04        | 54.09        |
| TiO <sub>2</sub>                    | =             | =             | =             | =             | =             | =            | =             | =            | =            | =            |
| Cr <sub>2</sub> O <sub>3</sub>      | =             | =             | =             | =             | =             | =            | =             | =            | =            | =            |
| Al <sub>2</sub> O <sub>3</sub>      | 13.02         | 12.69         | 14.79         | 17.68         | 12.84         | 18.56        | 19.86         | 17           | 14.83        | 9.73         |
| Fe <sub>2</sub> O <sub>3</sub>      | 4.28          | 5.5           | 4.93          | 2.89          | 5.95          | 2.67         | 0.77          | 2.66         | 5.19         | 10.15        |
| FeO                                 | 3.89          | 3.12          | 2.39          | 3.64          | 2.82          | 3.57         | 4.23          | 4.02         | 3.57         | 2.27         |
| MnO                                 | =             | =             | =             | =             | =             | =            | =             | =            | =            | =            |
| MgO                                 | 4.92          | 4.83          | 4.09          | 2.12          | 4.83          | 1.4          | 1.26          | 2.29         | 3.35         | 4.77         |
| NiO                                 | =             | =             | =             | =             | =             | =            | =             | =            | =            | =            |
| CaO                                 | 7.66          | 8.14          | 6.56          | 4.19          | 7.78          | 3            | 2.66          | 4.81         | 5.37         | 9.5          |
| Na <sub>2</sub> O                   | 9.82          | 9.71          | 10.77         | 12.11         | 9.89          | 12.68        | 12.96         | 11.58        | 10.91        | 9            |
| K <sub>2</sub> O                    | =             | =             | =             | =             | =             | =            | =             | =            | =            | =            |
| <b>Total</b>                        | <b>100.46</b> | <b>100.17</b> | <b>100.42</b> | <b>100.28</b> | <b>100.35</b> | <b>99.35</b> | <b>100.26</b> | <b>99.19</b> | <b>99.26</b> | <b>99.52</b> |
| <b>Cations (based on 6 oxygens)</b> |               |               |               |               |               |              |               |              |              |              |
| Si                                  | 2.008         | 1.995         | 1.996         | 2.008         | 1.992         | 2.012        | 2.020         | 2.007        | 1.996        | 1.970        |
| Ti                                  | 0             | 0             | 0             | 0             | 0             | 0            | 0             | 0            | 0            | 0            |
| Cr                                  | 0             | 0             | 0             | 0             | 0             | 0            | 0             | 0            | 0            | 0            |
| Al                                  | 0.542         | 0.531         | 0.611         | 0.726         | 0.536         | 0.766        | 0.808         | 0.708        | 0.623        | 0.418        |
| Fe <sup>3+</sup>                    | 0.114         | 0.147         | 0.130         | 0.076         | 0.159         | 0.070        | 0.020         | 0.071        | 0.139        | 0.278        |
| Fe <sup>2+</sup>                    | 0.115         | 0.093         | 0.070         | 0.106         | 0.083         | 0.105        | 0.122         | 0.119        | 0.106        | 0.069        |
| Mn                                  | 0             | 0             | 0             | 0             | 0             | 0            | 0             | 0            | 0            | 0            |
| Mg                                  | 0.259         | 0.256         | 0.214         | 0.110         | 0.255         | 0.073        | 0.065         | 0.121        | 0.178        | 0.259        |
| Ni                                  | 0             | 0             | 0             | 0             | 0             | 0            | 0             | 0            | 0            | 0            |
| Ca                                  | 0.290         | 0.310         | 0.247         | 0.156         | 0.295         | 0.113        | 0.098         | 0.182        | 0.205        | 0.371        |
| Na                                  | 0.672         | 0.669         | 0.732         | 0.818         | 0.679         | 0.861        | 0.867         | 0.793        | 0.753        | 0.636        |
| K                                   | 0             | 0             | 0             | 0             | 0             | 0            | 0             | 0            | 0            | 0            |
| <b>End-members</b>                  |               |               |               |               |               |              |               |              |              |              |
| Wollastonite                        | 0.145         | 0.152         | 0.121         | 0.078         | 0.144         | 0.056        | 0.049         | 0.091        | 0.100        | 0.170        |
| Enstatite                           | 0.129         | 0.128         | 0.107         | 0.055         | 0.128         | 0.037        | 0.032         | 0.06         | 0.089        | 0.129        |
| Ferrosilite                         | 0.057         | 0.046         | 0.035         | 0.053         | 0.042         | 0.052        | 0.061         | 0.059        | 0.053        | 0.035        |
| Pyroxmangite                        | =             | =             | =             | =             | =             | =            | =             | =            | =            | =            |
| Aegirine                            | 0.114         | 0.147         | 0.13          | 0.076         | 0.159         | 0.07         | 0.02          | 0.071        | 0.139        | 0.278        |
| Jadeite                             | 0.542         | 0.521         | 0.602         | 0.726         | 0.521         | 0.766        | 0.808         | 0.708        | 0.614        | 0.357        |
| CaAl <sub>2</sub> SiO <sub>6</sub>  | =             | 0.005         | 0.005         | =             | 0.008         | =            | =             | =            | 0.004        | 0.030        |
| CaFeAlSiO <sub>6</sub>              | =             | =             | =             | =             | =             | =            | =             | =            | =            | =            |
| CaCrAlSiO <sub>6</sub>              | =             | =             | =             | =             | =             | =            | =             | =            | =            | =            |
| CaTiAl <sub>2</sub> O <sub>6</sub>  | =             | =             | =             | =             | =             | =            | =             | =            | =            | =            |

130 **Table S7**

131

132

133

134

135

136

137

138

139

140

141

142

143

144

145

146 Sample (thin section): 3088

| <b>Garnets</b>                       |               |               |               |               |               |               |              |               |               |               |
|--------------------------------------|---------------|---------------|---------------|---------------|---------------|---------------|--------------|---------------|---------------|---------------|
| <b>Oxides (wt %)</b>                 | <b>1</b>      | <b>2</b>      | <b>3</b>      | <b>4</b>      | <b>5</b>      | <b>6</b>      | <b>7</b>     | <b>8</b>      | <b>9</b>      | <b>10</b>     |
| SiO <sub>2</sub>                     | 37.18         | 37.47         | 37.51         | 37.84         | 37.59         | 37.72         | 37.17        | 37.28         | 38.2          | 38.09         |
| TiO <sub>2</sub>                     | =             | =             | =             | =             | =             | =             | =            | =             | =             | =             |
| Cr <sub>2</sub> O <sub>3</sub>       | =             | =             | =             | =             | =             | =             | =            | =             | =             | =             |
| Al <sub>2</sub> O <sub>3</sub>       | 21.08         | 21.21         | 21.04         | 21.54         | 21.21         | 21.3          | 20.71        | 21            | 21.18         | 21.25         |
| Fe <sub>2</sub> O <sub>3</sub>       | 3.14          | 1.65          | 2.67          | 1.85          | 2.21          | 1.94          | 2.8          | 3.57          | 2.21          | 0.66          |
| FeO                                  | 28.06         | 30.16         | 29.89         | 28.98         | 29.60         | 29.28         | 28.88        | 29.72         | 30.95         | 30.2          |
| MnO                                  | 1.49          | 0.81          | 1.07          | 1.17          | 1.06          | 1.61          | 1.21         | 1.2           | 0.97          | 1.2           |
| MgO                                  | 5.08          | 5.24          | 5.53          | 6.18          | 4.92          | 4.71          | 5.13         | 4.82          | 5.09          | 5.62          |
| NiO                                  | =             | =             | =             | =             | =             | =             | =            | =             | =             | =             |
| CaO                                  | 4.56          | 3.51          | 3.15          | 3.18          | 4.29          | 4.53          | 4.06         | 3.94          | 3.65          | 3.21          |
| Na <sub>2</sub> O                    | =             | =             | =             | =             | =             | =             | =            | =             | =             | =             |
| K <sub>2</sub> O                     | =             | =             | =             | =             | =             | =             | =            | =             | =             | =             |
| <b>Total</b>                         | <b>100.59</b> | <b>100.05</b> | <b>100.85</b> | <b>100.73</b> | <b>100.88</b> | <b>101.08</b> | <b>99.96</b> | <b>101.54</b> | <b>102.25</b> | <b>100.24</b> |
| <b>Cations (based on 12 oxygens)</b> |               |               |               |               |               |               |              |               |               |               |
| Si                                   | 2.929         | 2.963         | 2.947         | 2.954         | 2.953         | 2.958         | 2.948        | 2.924         | 2.966         | 2.996         |
| Ti                                   | 0             | 0             | 0             | 0             | 0             | 0             | 0            | 0             | 0             | 0             |
| Cr                                   | 0             | 0             | 0             | 0             | 0             | 0             | 0            | 0             | 0             | 0             |
| Al                                   | 1.957         | 1.976         | 1.948         | 1.982         | 1.964         | 1.969         | 1.936        | 1.942         | 1.938         | 1.970         |
| Fe <sup>3+</sup>                     | 0.186         | 0.098         | 0.158         | 0.109         | 0.131         | 0.114         | 0.167        | 0.211         | 0.129         | 0.039         |
| Fe <sup>2+</sup>                     | 1.848         | 1.994         | 1.963         | 1.892         | 1.945         | 1.920         | 1.916        | 1.950         | 2.010         | 1.986         |
| Mn                                   | 0.099         | 0.054         | 0.071         | 0.077         | 0.071         | 0.107         | 0.081        | 0.080         | 0.064         | 0.080         |
| Mg                                   | 0.596         | 0.617         | 0.647         | 0.719         | 0.576         | 0.551         | 0.607        | 0.564         | 0.589         | 0.659         |
| Ni                                   | 0             | 0             | 0             | 0             | 0             | 0             | 0            | 0             | 0             | 0             |
| Ca                                   | 0.385         | 0.297         | 0.265         | 0.266         | 0.361         | 0.381         | 0.345        | 0.331         | 0.304         | 0.271         |
| Na                                   | 0             | 0             | 0             | 0             | 0             | 0             | 0            | 0             | 0             | 0             |
| K                                    | 0             | 0             | 0             | 0             | 0             | 0             | 0            | 0             | 0             | 0             |
| <b>End-members</b>                   |               |               |               |               |               |               |              |               |               |               |
| Grossular                            | 0.036         | 0.051         | 0.01          | 0.035         | 0.056         | 0.071         | 0.032        | 0.005         | 0.037         | 0.071         |
| Almandine                            | 0.631         | 0.673         | 0.666         | 0.64          | 0.659         | 0.649         | 0.65         | 0.667         | 0.678         | 0.663         |
| Pyrope                               | 0.204         | 0.208         | 0.22          | 0.243         | 0.195         | 0.186         | 0.206        | 0.193         | 0.199         | 0.22          |
| Spessartine                          | 0.034         | 0.018         | 0.024         | 0.026         | 0.024         | 0.036         | 0.028        | 0.027         | 0.022         | 0.027         |
| Andradite                            | 0.095         | 0.05          | 0.08          | 0.055         | 0.066         | 0.058         | 0.085        | 0.108         | 0.065         | 0.02          |
| Uvarovite                            | =             | =             | =             | =             | =             | =             | =            | =             | =             | =             |
| Ti-Al Garnet                         | =             | =             | =             | =             | =             | =             | =            | =             | =             | =             |
| Na-Ti Garnet                         | =             | =             | =             | =             | =             | =             | =            | =             | =             | =             |
| Grossular                            | 0.036         | 0.051         | 0.01          | 0.035         | 0.056         | 0.071         | 0.032        | 0.005         | 0.037         | 0.071         |
| Almandine                            | 0.631         | 0.673         | 0.666         | 0.64          | 0.659         | 0.649         | 0.65         | 0.667         | 0.678         | 0.663         |

Table S8

147  
148  
149  
150  
151  
152  
153  
154  
155  
156  
157  
158  
159  
160  
161  
162  
163  
164  
165  
166

167 Sample (thin section): 5653

| <b>Clinopyroxenes</b>               |               |              |               |               |              |               |              |               |              |               |
|-------------------------------------|---------------|--------------|---------------|---------------|--------------|---------------|--------------|---------------|--------------|---------------|
| <b>Oxides (wt %)</b>                | <b>1</b>      | <b>2</b>     | <b>3</b>      | <b>4</b>      | <b>5</b>     | <b>6</b>      | <b>7</b>     | <b>8</b>      | <b>9</b>     | <b>10</b>     |
| SiO <sub>2</sub>                    | 56.44         | 53.70        | 55.88         | 56.12         | 55.68        | 55.99         | 55.35        | 56.16         | 54.70        | 55.23         |
| TiO <sub>2</sub>                    | =             | =            | =             | =             | =            | =             | =            | =             | =            | =             |
| Cr <sub>2</sub> O <sub>3</sub>      | =             | =            | =             | =             | =            | =             | =            | =             | =            | =             |
| Al <sub>2</sub> O <sub>3</sub>      | 10.57         | 9.81         | 10.01         | 9.63          | 8.72         | 9.79          | 10.30        | 9.93          | 10.93        | 11.03         |
| Fe <sub>2</sub> O <sub>3</sub>      | 7.27          | 5.5          | 5.56          | 4.37          | 4.31         | 5.78          | 5.89         | 6.69          | 2.45         | 3.42          |
| FeO                                 | 0.94          | 6.37         | 1.90          | 2.86          | 2.85         | 2.29          | 2.06         | 1.73          | 7.98         | 7.12          |
| MnO                                 | =             | =            | =             | =             | =            | =             | =            | =             | =            | =             |
| MgO                                 | 6.7           | 4.48         | 7.25          | 7.33          | 8.24         | 6.91          | 6.63         | 6.76          | 4.54         | 4.36          |
| NiO                                 | =             | =            | =             | =             | =            | =             | =            | =             | =            | =             |
| CaO                                 | 10.52         | 11.16        | 11.87         | 12.16         | 13.08        | 11.65         | 10.72        | 11.21         | 11.69        | 11.83         |
| Na <sub>2</sub> O                   | 8.87          | 7.67         | 7.93          | 7.68          | 6.96         | 8.07          | 8.32         | 8.41          | 7.41         | 7.77          |
| K <sub>2</sub> O                    | =             | =            | =             | =             | =            | =             | =            | =             | =            | =             |
| <b>Total</b>                        | <b>101.31</b> | <b>98.68</b> | <b>100.40</b> | <b>100.15</b> | <b>99.85</b> | <b>100.48</b> | <b>99.26</b> | <b>100.89</b> | <b>99.70</b> | <b>100.75</b> |
| <b>Cations (based on 6 oxygens)</b> |               |              |               |               |              |               |              |               |              |               |
| Si                                  | 1.987         | 1.985        | 1.989         | 2.004         | 2.000        | 1.996         | 1.992        | 1.993         | 1.993        | 1.991         |
| Ti                                  | 0             | 0            | 0             | 0             | 0            | 0             | 0            | 0             | 0            | 0             |
| Cr                                  | 0             | 0            | 0             | 0             | 0            | 0             | 0            | 0             | 0            | 0             |
| Al                                  | 0.439         | 0.427        | 0.420         | 0.405         | 0.369        | 0.411         | 0.437        | 0.415         | 0.469        | 0.468         |
| Fe <sup>3+</sup>                    | 0.193         | 0.153        | 0.149         | 0.118         | 0.117        | 0.155         | 0.1600       | 0.178         | 0.067        | 0.093         |
| Fe <sup>2+</sup>                    | 0.028         | 0.197        | 0.057         | 0.085         | 0.086        | 0.068         | 0.062        | 0.051         | 0.243        | 0.215         |
| Mn                                  | 0             | 0            | 0             | 0             | 0            | 0             | 0            | 0             | 0            | 0             |
| Mg                                  | 0.352         | 0.247        | 0.385         | 0.390         | 0.441        | 0.367         | 0.356        | 0.357         | 0.247        | 0.234         |
| Ni                                  | 0             | 0            | 0             | 0             | 0            | 0             | 0            | 0             | 0            | 0             |
| Ca                                  | 0.397         | 0.442        | 0.453         | 0.465         | 0.503        | 0.445         | 0.413        | 0.426         | 0.457        | 0.457         |
| Na                                  | 0.606         | 0.541        | 0.548         | 0.532         | 0.485        | 0.558         | 0.581        | 0.579         | 0.524        | 0.543         |
| K                                   | 0             | 0            | 0             | 0             | 0            | 0             | 0            | 0             | 0            | 0             |
| <b>End-members</b>                  |               |              |               |               |              |               |              |               |              |               |
| Wollastonite                        | 0.192         | 0.213        | 0.221         | 0.233         | 0.252        | 0.22          | 0.203        | 0.209         | 0.225        | 0.224         |
| Enstatite                           | 0.176         | 0.123        | 0.192         | 0.195         | 0.221        | 0.183         | 0.178        | 0.179         | 0.123        | 0.117         |
| Ferrosilite                         | 0.014         | 0.098        | 0.028         | 0.043         | 0.043        | 0.034         | 0.031        | 0.026         | 0.122        | 0.107         |
| Pyroxmangite                        | =             | =            | =             | =             | =            | =             | =            | =             | =            | =             |
| Aegirine                            | 0.193         | 0.153        | 0.149         | 0.118         | 0.116        | 0.155         | 0.159        | 0.178         | 0.067        | 0.093         |
| Jadeite                             | 0.413         | 0.397        | 0.399         | 0.405         | 0.368        | 0.402         | 0.421        | 0.4           | 0.456        | 0.45          |
| CaAl <sub>2</sub> SiO <sub>6</sub>  | 0.013         | 0.015        | 0.011         | =             | =            | 0.004         | 0.008        | 0.007         | 0.007        | 0.009         |
| CaFeAlSiO <sub>6</sub>              | =             | =            | =             | =             | =            | =             | =            | =             | =            | =             |
| CaCrAlSiO <sub>6</sub>              | =             | =            | =             | =             | =            | =             | =            | =             | =            | =             |
| CaTiAl <sub>2</sub> O <sub>6</sub>  | =             | =            | =             | =             | =            | =             | =            | =             | =            | =             |

168 **Table S9**

169  
170  
171  
172  
173  
174  
175  
176  
177  
178  
179  
180  
181  
182  
183  
184  
185  
186  
187

188 Sample (thin section): 5653

| <b>Garnets</b>                       |              |              |             |             |              |              |              |              |
|--------------------------------------|--------------|--------------|-------------|-------------|--------------|--------------|--------------|--------------|
| <b>Oxides (wt %)</b>                 | <b>1</b>     | <b>2</b>     | <b>3</b>    | <b>4</b>    | <b>5</b>     | <b>6</b>     | <b>7</b>     | <b>8</b>     |
| SiO <sub>2</sub>                     | 36.77        | 36.65        | 36.5        | 36.56       | 36.63        | 36.06        | 36.41        | 36.1         |
| TiO <sub>2</sub>                     | =            | =            | =           | =           | =            | =            | =            | =            |
| Cr <sub>2</sub> O <sub>3</sub>       | =            | =            | =           | =           | =            | =            | =            | =            |
| Al <sub>2</sub> O <sub>3</sub>       | 20.33        | 20.52        | 20.09       | 20.51       | 20.53        | 19.96        | 20.04        | 20.43        |
| Fe <sub>2</sub> O <sub>3</sub>       | 2.46         | 2.43         | 2.48        | 2.02        | 1.88         | 1.55         | 2.37         | 3.58         |
| FeO                                  | 27.66        | 26.58        | 27.88       | 29.55       | 28.27        | 27.83        | 27.68        | 24.48        |
| MnO                                  | 2.29         | 1.49         | 2.27        | 1.94        | 1.99         | 2.1          | 1.3          | 0.78         |
| MgO                                  | 3.26         | 3.71         | 2.63        | 4.34        | 4.08         | 3.99         | 4.58         | 4.99         |
| NiO                                  | =            | =            | =           | =           | =            | =            | =            | =            |
| CaO                                  | 6.38         | 7.12         | 6.85        | 3.49        | 4.87         | 4.72         | 4.98         | 7.03         |
| Na <sub>2</sub> O                    | =            | =            | =           | =           | =            | =            | =            | =            |
| K <sub>2</sub> O                     | =            | =            | =           | =           | =            | =            | =            | =            |
| <b>Total</b>                         | <b>99.16</b> | <b>98.50</b> | <b>98.7</b> | <b>98.4</b> | <b>98.26</b> | <b>96.22</b> | <b>97.36</b> | <b>97.39</b> |
| <b>Cations (based on 12 oxygens)</b> |              |              |             |             |              |              |              |              |
| Si                                   | 2.961        | 2.952        | 2.963       | 2.960       | 2.964        | 2.980        | 2.966        | 2.918        |
| Ti                                   | 0            | 0            | 0           | 0           | 0            | 0            | 0            | 0            |
| Cr                                   | 0            | 0            | 0           | 0           | 0            | 0            | 0            | 0            |
| Al                                   | 1.929        | 1.948        | 1.922       | 1.957       | 1.958        | 1.944        | 1.924        | 1.946        |
| Fe <sup>3+</sup>                     | 0.149        | 0.147        | 0.151       | 0.123       | 0.115        | 0.097        | 0.145        | 0.218        |
| Fe <sup>2+</sup>                     | 1.863        | 1.791        | 1.893       | 2.001       | 1.913        | 1.924        | 1.885        | 1.655        |
| Mn                                   | 0.156        | 0.102        | 0.156       | 0.133       | 0.136        | 0.147        | 0.090        | 0.053        |
| Mg                                   | 0.391        | 0.445        | 0.318       | 0.524       | 0.492        | 0.491        | 0.556        | 0.601        |
| Ni                                   | 0            | 0            | 0           | 0           | 0            | 0            | 0            | 0            |
| Ca                                   | 0.550        | 0.615        | 0.596       | 0.303       | 0.422        | 0.418        | 0.435        | 0.609        |
| Na                                   | 0            | 0            | 0           | 0           | 0            | 0            | 0            | 0            |
| K                                    | 0            | 0            | 0           | 0           | 0            | 0            | 0            | 0            |
| <b>End-members</b>                   |              |              |             |             |              |              |              |              |
| Grossular                            | 0.11         | 0.133        | 0.125       | 0.04        | 0.084        | 0.092        | 0.073        | 0.097        |
| Almandine                            | 0.629        | 0.607        | 0.639       | 0.676       | 0.646        | 0.646        | 0.636        | 0.567        |
| Pyrope                               | 0.132        | 0.151        | 0.107       | 0.177       | 0.166        | 0.165        | 0.187        | 0.206        |
| Spessartine                          | 0.053        | 0.034        | 0.053       | 0.045       | 0.046        | 0.049        | 0.03         | 0.018        |
| Andradite                            | 0.076        | 0.075        | 0.077       | 0.062       | 0.058        | 0.049        | 0.073        | 0.112        |
| Uvarovite                            | =            | =            | =           | =           | =            | =            | =            | =            |
| Ti-Al Garnet                         | =            | =            | =           | =           | =            | =            | =            | =            |
| Na-Ti Garnet                         | =            | =            | =           | =           | =            | =            | =            | =            |
| Grossular                            | 0.11         | 0.133        | 0.125       | 0.04        | 0.084        | 0.092        | 0.073        | 0.097        |
| Almandine                            | 0.629        | 0.607        | 0.639       | 0.676       | 0.646        | 0.646        | 0.636        | 0.567        |

Table S10

189  
190  
191  
192  
193  
194  
195  
196  
197  
198  
199  
200  
201  
202  
203  
204  
205  
206  
207  
208

209 Sample (thin section): 7144

| <b>Clinopyroxenes</b>               |              |              |               |               |              |              |              |              |              |              |
|-------------------------------------|--------------|--------------|---------------|---------------|--------------|--------------|--------------|--------------|--------------|--------------|
| <b>Oxides (wt %)</b>                | <b>1</b>     | <b>2</b>     | <b>3</b>      | <b>4</b>      | <b>5</b>     | <b>6</b>     | <b>7</b>     | <b>8</b>     | <b>9</b>     | <b>10</b>    |
| SiO <sub>2</sub>                    | 55.58        | 55.15        | 59.4          | 58.62         | 56.01        | 58.35        | 58.43        | 54.91        | 55.45        | 56.59        |
| TiO <sub>2</sub>                    | =            | =            | =             | =             | =            | =            | =            | =            | =            | =            |
| Cr <sub>2</sub> O <sub>3</sub>      | =            | =            | =             | =             | =            | =            | =            | =            | =            | =            |
| Al <sub>2</sub> O <sub>3</sub>      | 11.86        | 11.31        | 22.24         | 21.13         | 13.77        | 21.87        | 22.73        | 10.94        | 10.62        | 13.19        |
| Fe <sub>2</sub> O <sub>3</sub>      | 5.87         | 7.46         | =             | 0.89          | 7.74         | =            | =            | 5.58         | 5.76         | 4.11         |
| FeO                                 | 4            | 3.08         | 2.47          | 3.4           | 2.84         | 2.79         | 2.04         | 5.23         | 4.08         | 4.68         |
| MnO                                 | =            | =            | =             | =             | =            | =            | =            | =            | =            | =            |
| MgO                                 | 4.35         | 4.59         | 1.01          | 1.02          | 2.97         | 0.84         | 0.62         | 4.05         | 5.75         | 4.03         |
| NiO                                 | =            | =            | =             | =             | =            | =            | =            | =            | =            | =            |
| CaO                                 | 7.96         | 7.76         | 2.48          | 2.32          | 4.96         | 1.96         | 1.44         | 9.97         | 9.05         | 6.57         |
| Na <sub>2</sub> O                   | 9.6          | 9.65         | 13.41         | 13.35         | 11.32        | 13.53        | 13.76        | 8.72         | 8.71         | 10.22        |
| K <sub>2</sub> O                    | =            | =            | =             | =             | =            | =            | =            | =            | =            | =            |
| <b>Total</b>                        | <b>99.22</b> | <b>99.00</b> | <b>101.01</b> | <b>100.73</b> | <b>99.61</b> | <b>99.34</b> | <b>99.02</b> | <b>99.41</b> | <b>99.42</b> | <b>99.39</b> |
| <b>Cations (based on 6 oxygens)</b> |              |              |               |               |              |              |              |              |              |              |
| Si                                  | 2.004        | 1.996        | 2.016         | 2.005         | 1.998        | 2.011        | 2.014        | 1.997        | 2.001        | 2.021        |
| Ti                                  | 0            | 0            | 0             | 0             | 0            | 0            | 0            | 0            | 0            | 0            |
| Cr                                  | 0            | 0            | 0             | 0             | 0            | 0            | 0            | 0            | 0            | 0            |
| Al                                  | 0.504        | 0.482        | 0.890         | 0.852         | 0.579        | 0.889        | 0.923        | 0.469        | 0.452        | 0.555        |
| Fe <sup>3+</sup>                    | 0.159        | 0.203        | 0             | 0.023         | 0.208        | 0            | 0            | 0.153        | 0.156        | 0.111        |
| Fe <sup>2+</sup>                    | 0.121        | 0.093        | 0.070         | 0.097         | 0.085        | 0.080        | 0.059        | 0.159        | 0.123        | 0.140        |
| Mn                                  | 0            | 0            | 0             | 0             | 0            | 0            | 0            | 0            | 0            | 0            |
| Mg                                  | 0.234        | 0.248        | 0.051         | 0.052         | 0.158        | 0.043        | 0.032        | 0.220        | 0.309        | 0.215        |
| Ni                                  | 0            | 0            | 0             | 0             | 0            | 0            | 0            | 0            | 0            | 0            |
| Ca                                  | 0.308        | 0.301        | 0.090         | 0.085         | 0.190        | 0.072        | 0.053        | 0.388        | 0.350        | 0.251        |
| Na                                  | 0.671        | 0.677        | 0.883         | 0.886         | 0.783        | 0.904        | 0.919        | 0.615        | 0.609        | 0.708        |
| K                                   | 0            | 0            | 0             | 0             | 0            | 0            | 0            | 0            | 0            | 0            |
| <b>End-members</b>                  |              |              |               |               |              |              |              |              |              |              |
| Wollastonite                        | 0.154        | 0.148        | 0.045         | 0.043         | 0.094        | 0.036        | 0.027        | 0.192        | 0.175        | 0.126        |
| Enstatite                           | 0.117        | 0.124        | 0.026         | 0.026         | 0.079        | 0.022        | 0.016        | 0.11         | 0.155        | 0.107        |
| Ferrosilite                         | 0.06         | 0.047        | 0.035         | 0.049         | 0.042        | 0.04         | 0.029        | 0.08         | 0.061        | 0.07         |
| Pyroxmangite                        | =            | =            | =             | =             | =            | =            | =            | =            | =            | =            |
| Aegirine                            | 0.159        | 0.203        | =             | 0.023         | 0.208        | =            | =            | 0.153        | 0.156        | 0.111        |
| Jadeite                             | 0.504        | 0.474        | 0.883         | 0.852         | 0.575        | 0.888        | 0.919        | 0.462        | 0.452        | 0.555        |
| CaAl <sub>2</sub> SiO <sub>6</sub>  | 0            | 0.004        | =             | =             | 0.002        | =            | =            | 0.003        | 0            | 0            |
| CaFeAlSiO <sub>6</sub>              | =            | =            | =             | =             | =            | =            | =            | =            | =            | =            |
| CaCrAlSiO <sub>6</sub>              | =            | =            | =             | =             | =            | =            | =            | =            | =            | =            |
| CaTiAl <sub>2</sub> O <sub>6</sub>  | =            | =            | =             | =             | =            | =            | =            | =            | =            | =            |

Table S11

210  
211  
212  
213  
214  
215  
216  
217  
218  
219  
220  
221  
222  
223  
224  
225  
226  
227  
228  
229



230 Sample (thin section): **7144**

| <b>Garnets</b>                       |               |               |               |               |               |               |               |               |               |               |
|--------------------------------------|---------------|---------------|---------------|---------------|---------------|---------------|---------------|---------------|---------------|---------------|
| <b>Oxides (wt %)</b>                 | <b>1</b>      | <b>2</b>      | <b>3</b>      | <b>4</b>      | <b>5</b>      | <b>6</b>      | <b>7</b>      | <b>8</b>      | <b>9</b>      | <b>10</b>     |
| SiO <sub>2</sub>                     | 36.68         | 36.8          | 37.09         | 37.52         | 37.27         | 37.46         | 37.32         | 37.66         | 37.89         | 37.96         |
| TiO <sub>2</sub>                     | =             | =             | =             | =             | =             | =             | =             | =             | =             | =             |
| Cr <sub>2</sub> O <sub>3</sub>       | =             | =             | =             | =             | =             | =             | =             | =             | =             | =             |
| Al <sub>2</sub> O <sub>3</sub>       | 20.87         | 20.69         | 20.78         | 20.88         | 20.63         | 21.09         | 20.6          | 20.79         | 21.15         | 21.12         |
| Fe <sub>2</sub> O <sub>3</sub>       | 3.34          | 2.96          | 2.81          | 2.18          | 1.66          | 3.02          | 2.08          | 1.42          | 1.99          | 1.96          |
| FeO                                  | 29.78         | 29.16         | 32.44         | 32.66         | 33.58         | 29.46         | 29.95         | 31.99         | 32.82         | 32.52         |
| MnO                                  | 2.1           | 2.47          | 0.93          | 0.81          | 1.98          | 2.06          | 2.46          | 2.07          | 0.73          | 1.05          |
| MgO                                  | 2.3           | 1.7           | 3.97          | 3.95          | 2.91          | 2.3           | 1.99          | 3.13          | 3.94          | 3.47          |
| NiO                                  | =             | =             | =             | =             | =             | =             | =             | =             | =             | =             |
| CaO                                  | 6.13          | 7.27          | 3.04          | 3.39          | 2.96          | 7.14          | 6.74          | 4.19          | 3.69          | 4.39          |
| Na <sub>2</sub> O                    | =             | =             | =             | =             | =             | =             | =             | =             | =             | =             |
| K <sub>2</sub> O                     | =             | =             | =             | =             | =             | =             | =             | =             | =             | =             |
| <b>Total</b>                         | <b>101.21</b> | <b>101.05</b> | <b>101.06</b> | <b>101.39</b> | <b>101.00</b> | <b>102.53</b> | <b>101.14</b> | <b>101.25</b> | <b>102.21</b> | <b>102.47</b> |
| <b>Cations (based on 12 oxygens)</b> |               |               |               |               |               |               |               |               |               |               |
| Si                                   | 2.921         | 2.938         | 2.944         | 2.964         | 2.978         | 2.937         | 2.971         | 2.986         | 2.966         | 2.969         |
| Ti                                   | 0             | 0             | 0             | 0             | 0             | 0             | 0             | 0             | 0             | 0             |
| Cr                                   | 0             | 0             | 0             | 0             | 0             | 0             | 0             | 0             | 0             | 0             |
| Al                                   | 1.959         | 1.947         | 1.944         | 1.944         | 1.943         | 1.949         | 1.933         | 1.943         | 1.951         | 1.947         |
| Fe <sup>3+</sup>                     | 0.200         | 0.178         | 0.168         | 0.129         | 0.100         | 0.178         | 0.124         | 0.085         | 0.117         | 0.115         |
| Fe <sup>2+</sup>                     | 1.983         | 1.947         | 2.153         | 2.157         | 2.244         | 1.931         | 1.994         | 2.121         | 2.148         | 2.13          |
| Mn                                   | 0.142         | 0.167         | 0.063         | 0.054         | 0.134         | 0.137         | 0.166         | 0.139         | 0.048         | 0.070         |
| Mg                                   | 0.273         | 0.202         | 0.470         | 0.465         | 0.347         | 0.269         | 0.236         | 0.370         | 0.460         | 0.405         |
| Ni                                   | 0             | 0             | 0             | 0             | 0             | 0             | 0             | 0             | 0             | 0             |
| Ca                                   | 0.523         | 0.622         | 0.259         | 0.287         | 0.253         | 0.600         | 0.575         | 0.356         | 0.310         | 0.368         |
| Na                                   | 0             | 0             | 0             | 0             | 0             | 0             | 0             | 0             | 0             | 0             |
| K                                    | 0             | 0             | 0             | 0             | 0             | 0             | 0             | 0             | 0             | 0             |
| <b>End-members</b>                   |               |               |               |               |               |               |               |               |               |               |
| Grossular                            | 0.076         | 0.121         | 0.002         | 0.031         | 0.035         | 0.113         | 0.131         | 0.077         | 0.045         | 0.066         |
| Almandine                            | 0.679         | 0.663         | 0.731         | 0.728         | 0.754         | 0.658         | 0.671         | 0.71          | 0.724         | 0.716         |
| Pyrope                               | 0.093         | 0.069         | 0.16          | 0.157         | 0.116         | 0.092         | 0.079         | 0.124         | 0.155         | 0.136         |
| Spessartine                          | 0.048         | 0.057         | 0.021         | 0.018         | 0.045         | 0.047         | 0.056         | 0.047         | 0.016         | 0.023         |
| Andradite                            | 0.103         | 0.091         | 0.086         | 0.065         | 0.05          | 0.091         | 0.063         | 0.043         | 0.059         | 0.058         |
| Uvarovite                            | =             | =             | =             | =             | =             | =             | =             | =             | =             | =             |
| Ti-Al Garnet                         | =             | =             | =             | =             | =             | =             | =             | =             | =             | =             |
| Na-Ti Garnet                         | =             | =             | =             | =             | =             | =             | =             | =             | =             | =             |
| Grossular                            | 0.076         | 0.121         | 0.002         | 0.031         | 0.035         | 0.113         | 0.131         | 0.077         | 0.045         | 0.066         |
| Almandine                            | 0.679         | 0.663         | 0.731         | 0.728         | 0.754         | 0.658         | 0.671         | 0.71          | 0.724         | 0.716         |

**Table S12**

231  
232  
233  
234  
235  
236  
237  
238  
239  
240  
241  
242  
243  
244  
245  
246  
247  
248  
249

250 Sample (thin section): **67142/8936**

| <b>Clinopyroxenes</b>               |              |              |               |               |               |               |               |               |               |               |
|-------------------------------------|--------------|--------------|---------------|---------------|---------------|---------------|---------------|---------------|---------------|---------------|
| <b>Oxides (wt %)</b>                | <b>1</b>     | <b>2</b>     | <b>3</b>      | <b>4</b>      | <b>5</b>      | <b>6</b>      | <b>7</b>      | <b>8</b>      | <b>9</b>      | <b>10</b>     |
| SiO <sub>2</sub>                    | 54.61        | 54.88        | 55.66         | 55.71         | 55.94         | 55.42         | 56.06         | 55.85         | 55.96         | 55.99         |
| TiO <sub>2</sub>                    | =            | =            | =             | =             | =             | =             | =             | =             | =             | =             |
| Cr <sub>2</sub> O <sub>3</sub>      | =            | =            | =             | =             | =             | =             | =             | =             | =             | =             |
| Al <sub>2</sub> O <sub>3</sub>      | 11.3         | 10.73        | 10.37         | 10.14         | 10.41         | 10.15         | 10.92         | 11.17         | 10.41         | 11.76         |
| Fe <sub>2</sub> O <sub>3</sub>      | 6.5          | 5.86         | 7.23          | 5.98          | 7.62          | 5.49          | 7.35          | 4.29          | 5.02          | 4.22          |
| FeO                                 | 5.63         | 3.43         | 0.68          | 1.58          | 2.73          | 2.23          | 2.3           | 5.95          | 2.34          | 5.85          |
| MnO                                 | =            | =            | =             | =             | =             | =             | =             | =             | =             | =             |
| MgO                                 | 3.75         | 5.59         | 6.76          | 7.36          | 5.6           | 7.16          | 5.44          | 4.86          | 7.08          | 4.4           |
| NiO                                 | =            | =            | =             | =             | =             | =             | =             | =             | =             | =             |
| CaO                                 | 8.93         | 10.4         | 11.07         | 11.64         | 8.99          | 11.83         | 9.41          | 10.86         | 11.49         | 10.41         |
| Na <sub>2</sub> O                   | 8.96         | 8.39         | 8.55          | 7.98          | 9.2           | 7.79          | 9.27          | 8.25          | 8.03          | 8.61          |
| K <sub>2</sub> O                    | =            | =            | =             | =             | =             | =             | =             | =             | =             | =             |
| <b>Total</b>                        | <b>99.68</b> | <b>99.29</b> | <b>100.32</b> | <b>100.39</b> | <b>100.49</b> | <b>100.07</b> | <b>100.75</b> | <b>101.23</b> | <b>100.33</b> | <b>101.24</b> |
| <b>Cations (based on 6 oxygens)</b> |              |              |               |               |               |               |               |               |               |               |
| Si                                  | 1.985        | 1.986        | 1.981         | 1.983         | 1.997         | 1.982         | 1.992         | 1.993         | 1.992         | 1.994         |
| Ti                                  | 0            | 0            | 0             | 0             | 0             | 0             | 0             | 0             | 0             | 0             |
| Cr                                  | 0            | 0            | 0             | 0             | 0             | 0             | 0             | 0             | 0             | 0             |
| Al                                  | 0.484        | 0.458        | 0.435         | 0.425         | 0.438         | 0.428         | 0.457         | 0.470         | 0.437         | 0.494         |
| Fe <sup>3+</sup>                    | 0.178        | 0.160        | 0.194         | 0.160         | 0.205         | 0.148         | 0.197         | 0.115         | 0.135         | 0.113         |
| Fe <sup>2+</sup>                    | 0.171        | 0.104        | 0.020         | 0.047         | 0.082         | 0.067         | 0.068         | 0.178         | 0.070         | 0.174         |
| Mn                                  | 0            | 0            | 0             | 0             | 0             | 0             | 0             | 0             | 0             | 0             |
| Mg                                  | 0.203        | 0.302        | 0.359         | 0.390         | 0.298         | 0.382         | 0.288         | 0.259         | 0.376         | 0.234         |
| Ni                                  | 0            | 0            | 0             | 0             | 0             | 0             | 0             | 0             | 0             | 0             |
| Ca                                  | 0.348        | 0.403        | 0.422         | 0.444         | 0.344         | 0.453         | 0.358         | 0.415         | 0.438         | 0.397         |
| Na                                  | 0.631        | 0.589        | 0.590         | 0.551         | 0.637         | 0.540         | 0.639         | 0.571         | 0.554         | 0.595         |
| K                                   | 0            | 0            | 0             | 0             | 0             | 0             | 0             | 0             | 0             | 0             |
| <b>End-members</b>                  |              |              |               |               |               |               |               |               |               |               |
| Wollastonite                        | 0.166        | 0.194        | 0.201         | 0.213         | 0.17          | 0.218         | 0.175         | 0.204         | 0.215         | 0.196         |
| Enstatite                           | 0.102        | 0.151        | 0.179         | 0.195         | 0.149         | 0.191         | 0.144         | 0.129         | 0.188         | 0.117         |
| Ferrosilite                         | 0.086        | 0.052        | 0.01          | 0.024         | 0.041         | 0.033         | 0.034         | 0.089         | 0.035         | 0.087         |
| Pyroxmangite                        | =            | =            | =             | =             | =             | =             | =             | =             | =             | =             |
| Aegirine                            | 0.178        | 0.16         | 0.194         | 0.16          | 0.205         | 0.148         | 0.196         | 0.115         | 0.134         | 0.113         |
| Jadeite                             | 0.454        | 0.429        | 0.396         | 0.391         | 0.432         | 0.392         | 0.442         | 0.456         | 0.42          | 0.481         |
| CaAl <sub>2</sub> SiO <sub>6</sub>  | 0.015        | 0.014        | 0.019         | 0.017         | 0.003         | 0.018         | 0.008         | 0.007         | 0.009         | 0.006         |
| CaFeAlSiO <sub>6</sub>              | =            | =            | =             | =             | =             | =             | =             | =             | =             | =             |
| CaCrAlSiO <sub>6</sub>              | =            | =            | =             | =             | =             | =             | =             | =             | =             | =             |
| CaTiAl <sub>2</sub> O <sub>6</sub>  | =            | =            | =             | =             | =             | =             | =             | =             | =             | =             |

**Table S13**

251  
252  
253  
254  
255  
256  
257  
258  
259  
260  
261  
262  
263  
264  
265  
266  
267  
268  
269  
270

271 Sample (thin section): **67142/8936**

| <b>Garnets</b>                       |               |              |               |              |               |              |               |              |               |
|--------------------------------------|---------------|--------------|---------------|--------------|---------------|--------------|---------------|--------------|---------------|
| <b>Oxides (wt %)</b>                 | <b>1</b>      | <b>2</b>     | <b>3</b>      | <b>4</b>     | <b>5</b>      | <b>6</b>     | <b>7</b>      | <b>8</b>     | <b>9</b>      |
| SiO <sub>2</sub>                     | 37.85         | 37.50        | 37.64         | 37.25        | 37.40         | 37.33        | 36.79         | 37.17        | 37.24         |
| TiO <sub>2</sub>                     | =             | =            | =             | =            | =             | =            | =             | =            | =             |
| Cr <sub>2</sub> O <sub>3</sub>       | =             | =            | =             | =            | =             | =            | =             | =            | =             |
| Al <sub>2</sub> O <sub>3</sub>       | 21.08         | 20.71        | 21.17         | 20.98        | 20.99         | 20.74        | 20.75         | 21.10        | 21.29         |
| Fe <sub>2</sub> O <sub>3</sub>       | 2.63          | 1.78         | 2.79          | 1.98         | 1.92          | 1.83         | 2.24          | 1.82         | 3.07          |
| FeO                                  | 26.84         | 28.64        | 24.71         | 27.84        | 30.51         | 30.81        | 29.63         | 29.86        | 28.28         |
| MnO                                  | 0.74          | 0.66         | 0.73          | 0.57         | 0.93          | 1.03         | 3.04          | 1.85         | 0.58          |
| MgO                                  | 5.07          | 5.22         | 5.09          | 5.36         | 5.07          | 4.80         | 3.15          | 4.63         | 5.09          |
| NiO                                  | =             | =            | =             | =            | =             | =            | =             | =            | =             |
| CaO                                  | 6.75          | 4.86         | 8.19          | 5.13         | 3.31          | 3.30         | 4.43          | 3.48         | 5.15          |
| Na <sub>2</sub> O                    | =             | =            | =             | =            | =             | =            | =             | =            | =             |
| K <sub>2</sub> O                     | =             | =            | =             | =            | =             | =            | =             | =            | =             |
| <b>Total</b>                         | <b>100.95</b> | <b>99.37</b> | <b>100.32</b> | <b>99.11</b> | <b>100.13</b> | <b>99.84</b> | <b>100.02</b> | <b>99.91</b> | <b>100.69</b> |
| <b>Cations (based on 12 oxygens)</b> |               |              |               |              |               |              |               |              |               |
| Si                                   | 2.953         | 2.978        | 2.943         | 2.959        | 2.963         | 2.972        | 2.951         | 2.957        | 2.924         |
| Ti                                   | 0             | 0            | 0             | 0            | 0             | 0            | 0             | 0            | 0             |
| Cr                                   | 0             | 0            | 0             | 0            | 0             | 0            | 0             | 0            | 0             |
| Al                                   | 1.939         | 1.939        | 1.950         | 1.964        | 1.960         | 1.946        | 1.962         | 1.978        | 1.970         |
| Fe <sup>3+</sup>                     | 0.154         | 0.107        | 0.164         | 0.119        | 0.115         | 0.110        | 0.136         | 0.109        | 0.182         |
| Fe <sup>2+</sup>                     | 1.751         | 1.902        | 1.615         | 1.849        | 2.021         | 2.052        | 1.988         | 1.987        | 1.857         |
| Mn                                   | 0.049         | 0.044        | 0.048         | 0.039        | 0.063         | 0.069        | 0.207         | 0.125        | 0.039         |
| Mg                                   | 0.590         | 0.617        | 0.593         | 0.634        | 0.598         | 0.569        | 0.376         | 0.549        | 0.596         |
| Ni                                   | 0             | 0            | 0             | 0            | 0             | 0            | 0             | 0            | 0             |
| Ca                                   | 0.564         | 0.414        | 0.686         | 0.437        | 0.281         | 0.282        | 0.381         | 0.296        | 0.433         |
| Na                                   | 0             | 0            | 0             | 0            | 0             | 0            | 0             | 0            | 0             |
| K                                    | 0             | 0            | 0             | 0            | 0             | 0            | 0             | 0            | 0             |
| <b>End-members</b>                   |               |              |               |              |               |              |               |              |               |
| Grossular                            | 0.113         | 0.085        | 0.15          | 0.088        | 0.037         | 0.039        | 0.06          | 0.045        | 0.055         |
| Almandine                            | 0.593         | 0.639        | 0.549         | 0.625        | 0.682         | 0.69         | 0.674         | 0.672        | 0.635         |
| Pyrope                               | 0.2           | 0.207        | 0.201         | 0.214        | 0.202         | 0.191        | 0.127         | 0.186        | 0.204         |
| Spessartine                          | 0.016         | 0.015        | 0.016         | 0.013        | 0.021         | 0.023        | 0.07          | 0.042        | 0.013         |
| Andradite                            | 0.078         | 0.054        | 0.084         | 0.06         | 0.058         | 0.055        | 0.069         | 0.055        | 0.093         |
| Uvarovite                            | =             | =            | =             | =            | =             | =            | =             | =            | =             |
| Ti-Al Garnet                         | =             | =            | =             | =            | =             | =            | =             | =            | =             |
| Na-Ti Garnet                         | =             | =            | =             | =            | =             | =            | =             | =            | =             |
| Grossular                            | 0.113         | 0.085        | 0.15          | 0.088        | 0.037         | 0.039        | 0.06          | 0.045        | 0.055         |
| Almandine                            | 0.593         | 0.639        | 0.549         | 0.625        | 0.682         | 0.69         | 0.674         | 0.672        | 0.635         |

**Table S14**

272  
273  
274  
275  
276  
277  
278  
279  
280  
281  
282  
283  
284  
285  
286  
287  
288  
289  
290  
291

292 **Garnet-omphacitites**293 Sample (thin section): **3975**

| <b>Clinopyroxenes</b>               |              |              |              |              |              |              |              |              |              |              |
|-------------------------------------|--------------|--------------|--------------|--------------|--------------|--------------|--------------|--------------|--------------|--------------|
| <b>Oxides (wt %)</b>                | <b>1</b>     | <b>2</b>     | <b>3</b>     | <b>4</b>     | <b>5</b>     | <b>6</b>     | <b>7</b>     | <b>8</b>     | <b>9</b>     | <b>10</b>    |
| SiO <sub>2</sub>                    | 55.01        | 54.61        | 54.32        | 55.06        | 55.52        | 54.78        | 54.87        | 54.84        | 53.94        | 53.99        |
| TiO <sub>2</sub>                    | =            | =            | =            | =            | =            | =            | =            | =            | =            | =            |
| Cr <sub>2</sub> O <sub>3</sub>      | =            | 0.51         | 0.41         | =            | =            | 0.46         | =            | =            | 1.63         | =            |
| Al <sub>2</sub> O <sub>3</sub>      | 8.52         | 7.46         | 8.5          | 10.44        | 10.61        | 10.1         | 10.43        | 10.25        | 6.95         | 7.29         |
| Fe <sub>2</sub> O <sub>3</sub>      | 5.26         | 4.48         | 6.2          | 2.57         | 4.12         | 4.99         | 4.58         | 3.92         | 4.93         | 5.31         |
| FeO                                 | 0.85         | 2.65         | 0.66         | 2.83         | 0.68         | 0.87         | 1.34         | 1.94         | 1.83         | 1.16         |
| MnO                                 | =            | =            | =            | =            | =            | =            | =            | =            | =            | =            |
| MgO                                 | 8.84         | 8.97         | 9.01         | 7.85         | 8.07         | 7.71         | 7.47         | 7.61         | 9.08         | 9.56         |
| NiO                                 | =            | =            | =            | =            | =            | =            | =            | =            | =            | =            |
| CaO                                 | 13.66        | 14.49        | 14.09        | 12.38        | 12.95        | 12.65        | 12.38        | 12.41        | 14.68        | 15.41        |
| Na <sub>2</sub> O                   | 6.83         | 6.06         | 6.51         | 7.15         | 7.49         | 7.48         | 7.57         | 7.37         | 5.97         | 5.74         |
| K <sub>2</sub> O                    | =            | =            | =            | =            | =            | =            | =            | =            | =            | =            |
| <b>Total</b>                        | <b>98.98</b> | <b>99.23</b> | <b>99.70</b> | <b>98.29</b> | <b>99.44</b> | <b>99.04</b> | <b>98.64</b> | <b>98.34</b> | <b>99.00</b> | <b>98.46</b> |
| <b>Cations (based on 6 oxygens)</b> |              |              |              |              |              |              |              |              |              |              |
| Si                                  | 1.986        | 1.985        | 1.96         | 1.993        | 1.981        | 1.973        | 1.981        | 1.987        | 1.971        | 1.973        |
| Ti                                  | 0            | 0            | 0            | 0            | 0            | 0            | 0            | 0            | 0            | 0            |
| Cr                                  | 0            | 0.015        | 0.012        | 0            | 0            | 0.013        | 0            | 0            | 0.047        | 0            |
| Al                                  | 0.363        | 0.320        | 0.361        | 0.445        | 0.446        | 0.429        | 0.444        | 0.438        | 0.299        | 0.314        |
| Fe <sup>3+</sup>                    | 0.143        | 0.123        | 0.168        | 0.070        | 0.111        | 0.135        | 0.125        | 0.107        | 0.135        | 0.146        |
| Fe <sup>2+</sup>                    | 0.026        | 0.081        | 0.020        | 0.086        | 0.020        | 0.026        | 0.040        | 0.059        | 0.056        | 0.036        |
| Mn                                  | 0            | 0            | 0            | 0            | 0            | 0            | 0            | 0            | 0            | 0            |
| Mg                                  | 0.476        | 0.486        | 0.484        | 0.424        | 0.429        | 0.414        | 0.402        | 0.411        | 0.494        | 0.521        |
| Ni                                  | 0            | 0            | 0            | 0            | 0            | 0            | 0            | 0            | 0            | 0            |
| Ca                                  | 0.529        | 0.5644       | 0.544        | 0.480        | 0.495        | 0.488        | 0.479        | 0.482        | 0.575        | 0.604        |
| Na                                  | 0.478        | 0.427        | 0.455        | 0.502        | 0.518        | 0.522        | 0.530        | 0.518        | 0.423        | 0.407        |
| K                                   | 0            | 0            | 0            | 0            | 0            | 0            | 0            | 0            | 0            | 0            |
| <b>End-members</b>                  |              |              |              |              |              |              |              |              |              |              |
| Wollastonite                        | 0.257        | 0.275        | 0.25         | 0.237        | 0.238        | 0.230        | 0.23         | 0.234        | 0.273        | 0.288        |
| Enstatite                           | 0.238        | 0.243        | 0.242        | 0.212        | 0.215        | 0.207        | 0.201        | 0.205        | 0.247        | 0.260        |
| Ferrosilite                         | 0.013        | 0.04         | 0.01         | 0.043        | 0.01         | 0.013        | 0.02         | 0.029        | 0.028        | 0.018        |
| Pyroxmangite                        | =            | =            | =            | =            | =            | =            | =            | =            | =            | =            |
| Aegirine                            | 0.143        | 0.123        | 0.168        | 0.07         | 0.111        | 0.135        | 0.125        | 0.107        | 0.135        | 0.146        |
| Jadeite                             | 0.335        | 0.305        | 0.287        | 0.432        | 0.408        | 0.387        | 0.405        | 0.411        | 0.270        | 0.261        |
| CaAl <sub>2</sub> SiO <sub>6</sub>  | 0.014        | =            | 0.031        | 0.007        | 0.019        | 0.014        | 0.019        | 0.013        | =            | 0.027        |
| CaFeAlSiO <sub>6</sub>              | =            | =            | =            | =            | =            | =            | =            | =            | =            | =            |
| CaCrAlSiO <sub>6</sub>              | =            | 0.015        | 0.012        | =            | =            | 0.013        | =            | =            | 0.029        | =            |
| CaTiAl <sub>2</sub> O <sub>6</sub>  | =            | =            | =            | =            | =            | =            | =            | =            | =            | =            |

**Table S15**

294  
295  
296  
297  
298  
299  
300  
301  
302  
303  
304  
305  
306  
307  
308  
309  
310  
311

312 Sample (thin section): **3975**

| <b>Garnets</b>                       |              |              |              |              |               |
|--------------------------------------|--------------|--------------|--------------|--------------|---------------|
| <b>Oxides (wt %)</b>                 | <b>1</b>     | <b>2</b>     | <b>3</b>     | <b>4</b>     | <b>5</b>      |
| SiO <sub>2</sub>                     | 37.03        | 36.59        | 36.99        | 37.41        | 37.4          |
| TiO <sub>2</sub>                     | =            | =            | =            | =            | =             |
| Cr <sub>2</sub> O <sub>3</sub>       | =            | 0.46         | =            | 0.49         | =             |
| Al <sub>2</sub> O <sub>3</sub>       | 20.65        | 20.54        | 20.75        | 20.8         | 21.3          |
| Fe <sub>2</sub> O <sub>3</sub>       | 0.47         | 0.96         | 0.5          | 0.88         | 1.77          |
| FeO                                  | 31.09        | 30.6         | 30.37        | 29.23        | 26.16         |
| MnO                                  | 0.56         | 0.52         | 0.58         | 1.09         | 2.96          |
| MgO                                  | 2.79         | 2.36         | 2.71         | 3.51         | 4.19          |
| NiO                                  | =            | =            | =            | =            | =             |
| CaO                                  | 5.97         | 6.57         | 6.59         | 6.36         | 6.32          |
| Na <sub>2</sub> O                    | =            | =            | =            | =            | =             |
| K <sub>2</sub> O                     | =            | =            | =            | =            | =             |
| <b>Total</b>                         | <b>98.56</b> | <b>98.61</b> | <b>98.49</b> | <b>99.77</b> | <b>100.10</b> |
| <b>Cations (based on 12 oxygens)</b> |              |              |              |              |               |
| Si                                   | 3.000        | 2.973        | 2.995        | 2.9813       | 2.956         |
| Ti                                   | 0            | 0            | 0            | 0            | 0             |
| Cr                                   | 0            | 0.030        | 0            | 0.031        | 0             |
| Al                                   | 1.972        | 1.967        | 1.980        | 1.954        | 1.984         |
| Fe <sup>3+</sup>                     | 0.028        | 0.059        | 0.030        | 0.053        | 0.105         |
| Fe <sup>2+</sup>                     | 2.106        | 2.079        | 2.056        | 1.948        | 1.729         |
| Mn                                   | 0.038        | 0.036        | 0.040        | 0.074        | 0.198         |
| Mg                                   | 0.337        | 0.286        | 0.327        | 0.417        | 0.494         |
| Ni                                   | 0            | 0            | 0            | 0            | 0             |
| Ca                                   | 0.518        | 0.572        | 0.572        | 0.543        | 0.535         |
| Na                                   | 0            | 0            | 0            | 0            | 0             |
| K                                    | 0            | 0            | 0            | 0            | 0             |
| <b>End-members</b>                   |              |              |              |              |               |
| Grossular                            | 0.159        | 0.148        | 0.176        | 0.14         | 0.128         |
| Almandine                            | 0.702        | 0.699        | 0.687        | 0.653        | 0.585         |
| Pyrope                               | 0.112        | 0.096        | 0.109        | 0.14         | 0.167         |
| Spessartine                          | 0.013        | 0.012        | 0.013        | 0.025        | 0.067         |
| Andradite                            | 0.014        | 0.03         | 0.015        | 0.027        | 0.053         |
| Uvarovite                            | =            | 0.015        | =            | 0.016        | =             |
| Ti-Al Garnet                         | =            | =            | =            | =            | =             |
| Na-Ti Garnet                         | =            | =            | =            | =            | =             |

313 **Table S16**

314

315

316

317

318

319

320

321

322

323

324

325

326

327

328

329

330

331

332

333

334

335 Sample (thin section): 5319

| <b>Clinopyroxenes</b>               |          |          |          |          |          |          |          |          |          |           |
|-------------------------------------|----------|----------|----------|----------|----------|----------|----------|----------|----------|-----------|
| <b>Oxides (wt %)</b>                | <b>1</b> | <b>2</b> | <b>3</b> | <b>4</b> | <b>5</b> | <b>6</b> | <b>7</b> | <b>8</b> | <b>9</b> | <b>10</b> |
| SiO <sub>2</sub>                    | 54.76    | 54.44    | 54.74    | 53.77    | 55.28    | 55.04    | 55.7     | 54.39    | 54.97    | 53.38     |
| TiO <sub>2</sub>                    | =        | =        | =        | =        | =        | =        | =        | =        | =        | =         |
| Cr <sub>2</sub> O <sub>3</sub>      | =        | =        | =        | =        | =        | =        | =        | =        | =        | =         |
| Al <sub>2</sub> O <sub>3</sub>      | 5.88     | 7.88     | 7.96     | 7.5      | 6.76     | 7.66     | 7.19     | 6.61     | 7.6      | 5.68      |
| Fe <sub>2</sub> O <sub>3</sub>      | 7.59     | 6.19     | 7.37     | 7.29     | 7.07     | 7.11     | 7.18     | 6.93     | 6.62     | 7.27      |
| FeO                                 | 3.37     | 3.37     | 2.84     | 2.79     | 3.43     | 3.51     | 3.34     | 3.52     | 3.67     | 3.57      |
| MnO                                 | =        | =        | =        | =        | =        | =        | =        | =        | =        | =         |
| MgO                                 | 8.02     | 7.3      | 7.36     | 7.14     | 7.84     | 7.21     | 7.7      | 7.62     | 7.19     | 7.85      |
| NiO                                 | =        | =        | =        | =        | =        | =        | =        | =        | =        | =         |
| CaO                                 | 14.16    | 12.87    | 12.83    | 12.92    | 13.94    | 12.98    | 13.91    | 14.07    | 13.36    | 14.29     |
| Na <sub>2</sub> O                   | 6.4      | 6.95     | 7.13     | 6.95     | 6.65     | 7.08     | 6.84     | 6.45     | 6.93     | 6.03      |
| K <sub>2</sub> O                    | =        | =        | =        | =        | =        | =        | =        | =        | =        | =         |
| <b>Total</b>                        | 100.18   | 99.00    | 100.23   | 98.36    | 100.98   | 100.58   | 101.86   | 99.59    | 100.33   | 98.07     |
| <b>Cations (based on 6 oxygens)</b> |          |          |          |          |          |          |          |          |          |           |
| Si                                  | 1.996    | 1.991    | 1.980    | 1.984    | 1.993    | 1.988    | 1.989    | 1.991    | 1.991    | 1.991     |
| Ti                                  | 0        | 0        | 0        | 0        | 0        | 0        | 0        | 0        | 0        | 0         |
| Cr                                  | 0        | 0        | 0        | 0        | 0        | 0        | 0        | 0        | 0        | 0         |
| Al                                  | 0.253    | 0.340    | 0.339    | 0.326    | 0.287    | 0.326    | 0.303    | 0.285    | 0.324    | 0.250     |
| Fe <sup>3+</sup>                    | 0.208    | 0.170    | 0.201    | 0.202    | 0.192    | 0.193    | 0.193    | 0.191    | 0.180    | 0.204     |
| Fe <sup>2+</sup>                    | 0.103    | 0.103    | 0.086    | 0.086    | 0.104    | 0.106    | 0.100    | 0.108    | 0.111    | 0.111     |
| Mn                                  | 0        | 0        | 0        | 0        | 0        | 0        | 0        | 0        | 0        | 0         |
| Mg                                  | 0.436    | 0.398    | 0.397    | 0.393    | 0.421    | 0.388    | 0.410    | 0.416    | 0.388    | 0.437     |
| Ni                                  | 0        | 0        | 0        | 0        | 0        | 0        | 0        | 0        | 0        | 0         |
| Ca                                  | 0.553    | 0.504    | 0.497    | 0.511    | 0.538    | 0.502    | 0.532    | 0.552    | 0.518    | 0.571     |
| Na                                  | 0.452    | 0.493    | 0.500    | 0.497    | 0.465    | 0.496    | 0.474    | 0.458    | 0.487    | 0.436     |
| K                                   | 0        | 0        | 0        | 0        | 0        | 0        | 0        | 0        | 0        | 0         |
| <b>End-members</b>                  |          |          |          |          |          |          |          |          |          |           |
| Wollastonite                        | 0.274    | 0.248    | 0.239    | 0.248    | 0.266    | 0.245    | 0.261    | 0.271    | 0.255    | 0.281     |
| Enstatite                           | 0.218    | 0.199    | 0.198    | 0.196    | 0.211    | 0.194    | 0.205    | 0.208    | 0.194    | 0.218     |
| Ferrosilite                         | 0.051    | 0.052    | 0.043    | 0.043    | 0.052    | 0.053    | 0.05     | 0.054    | 0.056    | 0.056     |
| Pyroxmangite                        | =        | =        | =        | =        | =        | =        | =        | =        | =        | =         |
| Aegirine                            | 0.208    | 0.17     | 0.201    | 0.202    | 0.192    | 0.193    | 0.193    | 0.191    | 0.18     | 0.204     |
| Jadeite                             | 0.244    | 0.323    | 0.3      | 0.295    | 0.273    | 0.303    | 0.281    | 0.267    | 0.306    | 0.232     |
| CaAl <sub>2</sub> SiO <sub>6</sub>  | 0.004    | 0.009    | 0.02     | 0.016    | 0.007    | 0.012    | 0.011    | 0.009    | 0.009    | 0.009     |
| CaFeAlSiO <sub>6</sub>              | =        | =        | =        | =        | =        | =        | =        | =        | =        | =         |
| CaCrAlSiO <sub>6</sub>              | =        | =        | =        | =        | =        | =        | =        | =        | =        | =         |
| CaTiAl <sub>2</sub> O <sub>6</sub>  | =        | =        | =        | =        | =        | =        | =        | =        | =        | =         |

336 **Table S17**

337

338

339

340

341

342

343

344

345

346

347

348

349

350

351

352

353 Sample (thin section): **5319**

| <b>Garnets</b>                       |              |              |              |              |              |
|--------------------------------------|--------------|--------------|--------------|--------------|--------------|
| <b>Oxides (wt %)</b>                 | <b>1</b>     | <b>2</b>     | <b>3</b>     | <b>4</b>     | <b>5</b>     |
| SiO <sub>2</sub>                     | 33.13        | 33.71        | 33.77        | 35.40        | 34.47        |
| TiO <sub>2</sub>                     | =            | =            | =            | =            | =            |
| Cr <sub>2</sub> O <sub>3</sub>       | =            | =            | =            | =            | =            |
| Al <sub>2</sub> O <sub>3</sub>       | 18.36        | 19.00        | 19.13        | 19.28        | 19.19        |
| Fe <sub>2</sub> O <sub>3</sub>       | 3.94         | 4.08         | 4.76         | 3.78         | 4.60         |
| FeO                                  | 33.58        | 29.57        | 33.26        | 29.63        | 28.50        |
| MnO                                  | 3.01         | 1.79         | 2.92         | 2.12         | 1.29         |
| MgO                                  | 1.38         | 3.94         | 2.27         | 3.83         | 3.12         |
| NiO                                  | =            | =            | =            | =            | =            |
| CaO                                  | 1.82         | 3.16         | 2.12         | 4.01         | 6.30         |
| Na <sub>2</sub> O                    | =            | =            | =            | =            | =            |
| K <sub>2</sub> O                     | =            | =            | =            | =            | =            |
| <b>Total</b>                         | <b>95.22</b> | <b>95.26</b> | <b>98.23</b> | <b>98.05</b> | <b>97.47</b> |
| <b>Cations (based on 12 oxygens)</b> |              |              |              |              |              |
| Si                                   | 2.869        | 2.848        | 2.819        | 2.903        | 2.847        |
| Ti                                   | 0            | 0            | 0            | 0            | 0            |
| Cr                                   | 0            | 0            | 0            | 0            | 0            |
| Al                                   | 1.874        | 1.892        | 1.882        | 1.864        | 1.868        |
| Fe <sup>3+</sup>                     | 0.257        | 0.260        | 0.299        | 0.233        | 0.286        |
| Fe <sup>2+</sup>                     | 2.432        | 2.090        | 2.322        | 2.032        | 1.968        |
| Mn                                   | 0.221        | 0.128        | 0.206        | 0.147        | 0.090        |
| Mg                                   | 0.178        | 0.496        | 0.283        | 0.468        | 0.384        |
| Ni                                   | 0            | 0            | 0            | 0            | 0            |
| Ca                                   | 0.169        | 0.286        | 0.190        | 0.352        | 0.557        |
| Na                                   | 0            | 0            | 0            | 0            | 0            |
| K                                    | 0            | 0            | 0            | 0            | 0            |
| <b>End-members</b>                   |              |              |              |              |              |
| Grossular                            | =            | =            | =            | 0.001        | 0.043        |
| Almandine                            | 0.811        | 0.697        | 0.774        | 0.677        | 0.656        |
| Pyrope                               | 0.059        | 0.165        | 0.094        | 0.156        | 0.128        |
| Spessartine                          | 0.074        | 0.043        | 0.069        | 0.049        | 0.030        |
| Andradite                            | 0.056        | 0.095        | 0.063        | 0.117        | 0.143        |
| Uvarovite                            | =            | =            | =            | =            | =            |
| Ti-Al Garnet                         | =            | =            | =            | =            | =            |
| Na-Ti Garnet                         | =            | =            | =            | =            | =            |

**Table S18**

354  
355  
356  
357  
358  
359  
360  
361  
362  
363  
364  
365  
366  
367  
368  
369  
370  
371  
372

373 Sample (thin section): 7736

| <b>Clinopyroxenes</b>               |               |               |               |               |               |               |              |              |              |               |
|-------------------------------------|---------------|---------------|---------------|---------------|---------------|---------------|--------------|--------------|--------------|---------------|
| <b>Oxides (wt %)</b>                | <b>1</b>      | <b>2</b>      | <b>3</b>      | <b>4</b>      | <b>5</b>      | <b>6</b>      | <b>7</b>     | <b>8</b>     | <b>9</b>     | <b>10</b>     |
| SiO <sub>2</sub>                    | 56.66         | 58.01         | 57.05         | 56.81         | 56.06         | 55.6          | 54.34        | 55.3         | 56.72        | 60.17         |
| TiO <sub>2</sub>                    | =             | =             | =             | =             | =             | =             | 0.52         | =            | =            | =             |
| Cr <sub>2</sub> O <sub>3</sub>      | =             | =             | =             | =             | =             | =             | =            | =            | =            | =             |
| Al <sub>2</sub> O <sub>3</sub>      | 14.41         | 18.44         | 14.36         | 13.14         | 12.45         | 12.59         | 10.98        | 11.92        | 14.54        | 23.98         |
| Fe <sub>2</sub> O <sub>3</sub>      | 8.76          | 4.71          | 7.98          | 8.36          | 2.79          | 2.16          | 9.14         | 10.84        | 6.19         | =             |
| FeO                                 | 2.99          | 2.8           | 3.53          | 3.09          | 7.39          | 7.56          | 5.46         | 2.07         | 4.49         | 1.38          |
| MnO                                 | =             | =             | =             | =             | =             | =             | =            | =            | =            | =             |
| MgO                                 | 2.33          | 1.25          | 2.27          | 2.97          | 3.72          | 3.81          | 2.21         | 3.25         | 2.41         | 0.7           |
| NiO                                 | =             | =             | =             | =             | =             | =             | =            | =            | =            | =             |
| CaO                                 | 3.95          | 2.37          | 3.9           | 4.64          | 11.34         | 12.1          | 5.06         | 5.56         | 3.74         | 1.48          |
| Na <sub>2</sub> O                   | 11.98         | 13.22         | 12            | 11.56         | 8.3           | 7.9           | 10.69        | 11.03        | 11.7         | 14.29         |
| K <sub>2</sub> O                    | =             | =             | =             | =             | =             | =             | =            | =            | =            | =             |
| <b>Total</b>                        | <b>101.08</b> | <b>100.80</b> | <b>101.09</b> | <b>100.57</b> | <b>102.05</b> | <b>101.72</b> | <b>98.40</b> | <b>99.97</b> | <b>99.79</b> | <b>102.00</b> |
| <b>Cations (based on 6 oxygens)</b> |               |               |               |               |               |               |              |              |              |               |
| Si                                  | 1.994         | 2.006         | 2.006         | 2.011         | 1.99          | 1.980         | 2.002        | 1.985        | 2.016        | 2.007         |
| Ti                                  | 0             | 0             | 0             | 0             | 0             | 0             | 0.014        | 0            | 0            | 0             |
| Cr                                  | 0             | 0             | 0             | 0             | 0             | 0             | 0            | 0            | 0            | 0             |
| Al                                  | 0.598         | 0.752         | 0.595         | 0.548         | 0.520         | 0.528         | 0.477        | 0.504        | 0.609        | 0.943         |
| Fe <sup>3+</sup>                    | 0.232         | 0.123         | 0.211         | 0.223         | 0.074         | 0.058         | 0.253        | 0.293        | 0.166        | 0             |
| Fe <sup>2+</sup>                    | 0.088         | 0.081         | 0.104         | 0.092         | 0.219         | 0.225         | 0.168        | 0.062        | 0.133        | 0.039         |
| Mn                                  | 0             | 0             | 0             | 0             | 0             | 0             | 0            | 0            | 0            | 0             |
| Mg                                  | 0.122         | 0.064         | 0.119         | 0.157         | 0.197         | 0.202         | 0.121        | 0.174        | 0.128        | 0.035         |
| Ni                                  | 0             | 0             | 0             | 0             | 0             | 0             | 0            | 0            | 0            | 0             |
| Ca                                  | 0.149         | 0.088         | 0.147         | 0.176         | 0.431         | 0.462         | 0.200        | 0.214        | 0.142        | 0.053         |
| Na                                  | 0.817         | 0.886         | 0.818         | 0.794         | 0.571         | 0.545         | 0.764        | 0.768        | 0.806        | 0.924         |
| K                                   | 0             | 0             | 0             | 0             | 0             | 0             | 0            | 0            | 0            | 0             |
| <b>End-members</b>                  |               |               |               |               |               |               |              |              |              |               |
| Wollastonite                        | 0.071         | 0.044         | 0.073         | 0.088         | 0.209         | 0.221         | 0.1          | 0.1          | 0.071        | 0.026         |
| Enstatite                           | 0.061         | 0.032         | 0.059         | 0.078         | 0.098         | 0.101         | 0.061        | 0.087        | 0.064        | 0.017         |
| Ferrosilite                         | 0.044         | 0.041         | 0.052         | 0.046         | 0.11          | 0.113         | 0.084        | 0.031        | 0.067        | 0.019         |
| Pyroxmangite                        | =             | =             | =             | =             | =             | =             | =            | =            | =            | =             |
| Aegirine                            | 0.232         | 0.123         | 0.211         | 0.223         | 0.074         | 0.058         | 0.253        | 0.293        | 0.166        | =             |
| Jadeite                             | 0.585         | 0.752         | 0.595         | 0.548         | 0.496         | 0.488         | 0.477        | 0.475        | 0.609        | 0.924         |
| CaAl <sub>2</sub> SiO <sub>6</sub>  | 0.006         | =             | =             | =             | 0.012         | 0.02          | 0            | 0.015        | =            | =             |
| CaFeAlSiO <sub>6</sub>              | =             | =             | =             | =             | =             | =             | =            | =            | =            | =             |
| CaCrAlSiO <sub>6</sub>              | =             | =             | =             | =             | =             | =             | =            | =            | =            | =             |
| CaTiAl <sub>2</sub> O <sub>6</sub>  | =             | =             | =             | =             | =             | =             | =            | =            | =            | =             |

Table S19

374  
375  
376  
377  
378  
379  
380  
381  
382  
383  
384  
385  
386  
387  
388  
389  
390  
391  
392  
393



394 Sample (thin section): 7736

| <b>Garnets</b>                       |          |          |          |          |          |
|--------------------------------------|----------|----------|----------|----------|----------|
| <b>Oxides (wt %)</b>                 | <b>1</b> | <b>2</b> | <b>3</b> | <b>4</b> | <b>5</b> |
| SiO <sub>2</sub>                     | 36.22    | 36.21    | 36.35    | 36.37    | 37.46    |
| TiO <sub>2</sub>                     | =        | =        | =        | =        | =        |
| Cr <sub>2</sub> O <sub>3</sub>       | =        | =        | =        | =        | =        |
| Al <sub>2</sub> O <sub>3</sub>       | 20.35    | 20.65    | 20.17    | 20.58    | 20.74    |
| Fe <sub>2</sub> O <sub>3</sub>       | 2.65     | 2.76     | 2.21     | 2.43     | 1.77     |
| FeO                                  | 32.70    | 35.65    | 36.26    | 36.07    | 30.25    |
| MnO                                  | 3.08     | 0.99     | 0.44     | 0.58     | 0.54     |
| MgO                                  | 2.90     | 2.43     | 2.49     | 2.60     | 5.48     |
| NiO                                  | =        | =        | =        | =        | =        |
| CaO                                  | 1.81     | 1.80     | 1.81     | 1.71     | 3.29     |
| Na <sub>2</sub> O                    | =        | =        | =        | =        | =        |
| K <sub>2</sub> O                     | =        | =        | =        | =        | =        |
| <b>Total</b>                         | 99.71    | 100.50   | 99.73    | 100.35   | 99.53    |
| <b>Cations (based on 12 oxygens)</b> |          |          |          |          |          |
| Si                                   | 2.944    | 2.931    | 2.963    | 2.944    | 2.976    |
| Ti                                   | 0        | 0        | 0        | 0        | 0        |
| Cr                                   | 0        | 0        | 0        | 0        | 0        |
| Al                                   | 1.950    | 1.970    | 1.938    | 1.964    | 1.942    |
| Fe <sup>3+</sup>                     | 0.163    | 0.169    | 0.136    | 0.148    | 0.106    |
| Fe <sup>2+</sup>                     | 2.223    | 2.413    | 2.47     | 2.442    | 2.010    |
| Mn                                   | 0.212    | 0.068    | 0.030    | 0.040    | 0.037    |
| Mg                                   | 0.352    | 0.293    | 0.303    | 0.314    | 0.650    |
| Ni                                   | 0        | 0        | 0        | 0        | 0        |
| Ca                                   | 0.157    | 0.157    | 0.158    | 0.148    | 0.280    |
| Na                                   | 0        | 0        | 0        | 0        | 0        |
| K                                    | 0        | 0        | 0        | 0        | 0        |
| <b>End-members</b>                   |          |          |          |          |          |
| Grossular                            | =        | =        | =        | =        | 0.041    |
| Almandine                            | 0.755    | 0.823    | 0.834    | 0.829    | 0.675    |
| Pyrope                               | 0.119    | 0.1      | 0.102    | 0.107    | 0.218    |
| Spessartine                          | 0.072    | 0.023    | 0.01     | 0.014    | 0.012    |
| Andradite                            | 0.053    | 0.053    | 0.053    | 0.05     | 0.053    |
| Uvarovite                            | =        | =        | =        | =        | =        |
| Ti-Al Garnet                         | =        | =        | =        | =        | =        |
| Na-Ti Garnet                         | =        | =        | =        | =        | =        |

395 **Table S20**
